# Supplementary material for: Evaluation of an innovative mobile health programme for the self-management of chronic obstructive pulmonary disease (MH-COPD): protocol of a randomised controlled trial
Source: PubMed Central journal article supplement — BMJ Open. 2019 Apr 25;9(4):e025381. doi: 10.1136/bmjopen-2018-025381 (PMC6502041; doi:10.1136/bmjopen-2018-025381), 2019-04-25
Supplement: bmjopen-2018-025381.draft_revisions.pdf [file bmjopen-2018-025381.draft_revisions.pdf]

# BMJ Open

BMJ Open is committed to open peer review. As part of this commitment we make the peer review history of every article we publish publicly available.

When an article is published we post the peer reviewers' comments and the authors' responses online. We also post the versions of the paper that were used during peer review. These are the versions that the peer review comments apply to.

The versions of the paper that follow are the versions that were submitted during the peer review process. They are not the versions of record or the final published versions. They should not be cited or distributed as the published version of this manuscript.

BMJ Open is an open access journal and the full, final, typeset and author-corrected version of record of the manuscript is available on our site with no access controls, subscription charges or pay-per-view fees (<http://bmjopen.bmj.com>).

If you have any questions on BMJ Open's open peer review process please email [editorial.bmjopen@bmj.com](mailto:editorial.bmjopen@bmj.com)

# BMJ Open

## Evaluation of an innovative mobile health program for the self-management of chronic obstructive pulmonary disease (MH-COPD): protocol of a randomized controlled trial

|                               |                                                                                                                                                                                                                                                                                                                                                                                                                                                                                                                                                                                                                                                                                                                                                                                                                                                                                                                                              |
|-------------------------------|----------------------------------------------------------------------------------------------------------------------------------------------------------------------------------------------------------------------------------------------------------------------------------------------------------------------------------------------------------------------------------------------------------------------------------------------------------------------------------------------------------------------------------------------------------------------------------------------------------------------------------------------------------------------------------------------------------------------------------------------------------------------------------------------------------------------------------------------------------------------------------------------------------------------------------------------|
| Journal:                      | <i>BMJ Open</i>                                                                                                                                                                                                                                                                                                                                                                                                                                                                                                                                                                                                                                                                                                                                                                                                                                                                                                                              |
| Manuscript ID                 | bmjopen-2018-025381                                                                                                                                                                                                                                                                                                                                                                                                                                                                                                                                                                                                                                                                                                                                                                                                                                                                                                                          |
| Article Type:                 | Protocol                                                                                                                                                                                                                                                                                                                                                                                                                                                                                                                                                                                                                                                                                                                                                                                                                                                                                                                                     |
| Date Submitted by the Author: | 16-Jul-2018                                                                                                                                                                                                                                                                                                                                                                                                                                                                                                                                                                                                                                                                                                                                                                                                                                                                                                                                  |
| Complete List of Authors:     | Ding, Hang; CSIRO, The Australian eHealth Research Centre<br>Karunanithi, Mohan; CSIRO, The Australian e-Health Research Centre<br>Ireland, Derek; The Australia eHealth Research Centre<br>McCarthy, Lisa; The Prince Charles Hospital, Metro North Hospital and Health Service<br>Hakim, Rekha; The Prince Charles Hospital, Metro North Hospital and Health Service<br>Phillips, Kirsten; Lung Foundation Australia<br>Pradhan, Rahul ; The Prince Charles Hospital, Metro North Hospital and Health Service<br>Seah, E-Hong ; The Prince Charles Hospital, Metro North Hospital and Health Service<br>Bowman, Rayleen ; The Prince Charles Hospital, Metro North Hospital and Health Service<br>Fong, Kwun; Prince Charles Hospital, Thoracic Research Centre<br>Masel, Philip ; The Prince Charles Hospital, Metro North Hospital and Health Service<br>Yang, Ian; The Prince Charles Hospital, Metro North Hospital and Health Service |
| Keywords:                     | Chronic pulmonary obstructive disease, randomized controlled trial, self-management, mobile health                                                                                                                                                                                                                                                                                                                                                                                                                                                                                                                                                                                                                                                                                                                                                                                                                                           |
|                               |                                                                                                                                                                                                                                                                                                                                                                                                                                                                                                                                                                                                                                                                                                                                                                                                                                                                                                                                              |

SCHOLARONE™  
Manuscripts

Evaluation of an innovative mobile health program for the self-management of chronic obstructive pulmonary disease (MH-COPD): protocol of a randomized controlled trial

Hang DING<sup>a,1</sup>, Mohan KARUNANITHI<sup>a</sup>, Derek IRELAND<sup>a</sup>, Lisa MCCARTHY<sup>b</sup>, Rekha HAKIM<sup>b</sup>, Kirsten PHILLIPS<sup>d</sup>, Rahul PRADHAN<sup>bc</sup>, E-Hong SEAH<sup>bc</sup>, Rayleen V. BOWMAN<sup>bc</sup>, Kwun M. FONG<sup>bc</sup>, Philip J. MASEL<sup>bc</sup>, Ian A. YANG<sup>bc</sup>

<sup>a</sup> *The Australian e-Health Research Centre, CSIRO, Brisbane, Australia*

<sup>b</sup> *The Prince Charles Hospital, Metro North Hospital and Health Service, Brisbane, Australia.*

<sup>c</sup> *University of Queensland Thoracic Research Centre, Faculty of Medicine, The University of Queensland, Brisbane, Australia*

<sup>d</sup> *Lung Foundation Australia, Brisbane, Australia*

### Abstract

**Introduction:** Chronic obstructive pulmonary disease (COPD) is the fourth leading cause of death globally. Resources to help patients self-manage COPD have long been available; however, patient adherence to these remains suboptimal. The objective of this study is to examine whether an innovative mobile health (mHealth)-enabled care program (MH-COPD) will improve the patient self-management and relevant health outcomes.

**Methods and Analysis:** A prospective open randomized controlled trial (RCT) has been designed. In the trial, patients with COPD will be recruited from The Prince Charles Hospital, Brisbane, Australia. They will then be randomized to participate in either the MH-COPD intervention group (n=50 patients), or usual care control group (UC-COPD) (n=50 patients) for 6 months. The MH-COPD program has been designed to integrate an mHealth system within a clinical COPD care service. In the program, participants will use a mobile health application at home to review educational videos, monitor COPD symptoms, use an electronic action plan, modify the risk factors of cigarette smoking and regular physical activity, and learn to use inhalers optimally. All participants will be assessed at baseline, 3 months and 6 months. The primary outcomes will be COPD symptoms and quality of life. The secondary outcomes will be patient adherence, physical activity, smoking cessation, use of COPD medicines, frequency of COPD exacerbations and hospital readmissions, and user experience of the mobile app.

### Ethics and Dissemination

The clinical trial has been approved by The Prince Charles Hospital Human Research Ethics Committee (HREC/16/QPCH/252), and registered in the Australian New Zealand Clinical Trials Registry (Trial ID: ACTRN12618001091291). The recruitment and follow-up of the trial will be from Jul 2018 to Jun 2020. The study outcomes will be disseminated through a journal publication, approximately 6 months after finishing data collection.

---

<sup>1</sup> Corresponding Author: Dr. Hang DING, The Australian e-Health Research Centre, CSIRO, Level 5 - UQ Health Sciences Building 901/16, Royal Brisbane and Women's Hospital, Herston 4029, Brisbane, Australia. Email: hang.ding@csiro.au

1  
2  
3  
4 **Trial registration:** Registered with Australian New Zealand Clinical Trial Registry (Trial ID:  
5 ACTRN12618001091291).  
6  
7

8 **Key words:** Chronic pulmonary obstructive disease, randomized controlled trial, self-management, mobile  
9 health  
10

#### 11 **Strengths and limitations of the study**

- 12 • Integration of an innovative mHealth system with a clinical COPD care service can  
13 potentially improve the self-management of COPD by patients.
- 14 • The mHealth system being tested delivers core recommendations for the self-management of  
15 COPD as advocated by the evidence-based guidelines.
- 16 • Specific health outcomes of relevance to the self-management will be measured in this  
17 mHealth-study.
- 18 • The study is limited to a 6-month intervention period, and as a purely self-management  
19 program, the mobile phone application does not include remote, real-time monitoring of  
20 patient outcomes by clinicians.  
21  
22  
23  
24  
25  
26  
27  
28  
29  
30

#### 31 **Protocol version**

32 Issue date: 12 July 2018

33 Protocol amendment number: 0

34 Authors: The research team of the MH-COPD study  
35  
36  
37  
38  
39  
40  
41  
42  
43  
44  
45  
46  
47  
48  
49  
50  
51  
52  
53  
54  
55  
56  
57  
58  
59  
60

## Introduction

Chronic obstructive pulmonary disease (COPD) is a progressive chronic lung disease, ranked as the fourth leading cause of death globally and affecting over 200 million people<sup>1</sup>. Patients with COPD have persistent respiratory symptoms and chronic airflow limitation, and are frequently impacted by episodic exacerbations of COPD. Consequently, they have high risks of hospital readmission, with reported 30-day readmission rates ranging from 10% to 20%<sup>2,3</sup>.

The self-management of COPD, such as optimal use of medicines, lifestyle modification and avoidance of risk factors, is essential to improve health outcomes and prevent COPD progression<sup>4,5</sup>. Accordingly, evidence-based self-management principles are recommended in clinical guidelines for COPD. Unfortunately patient adherence with self-management is often suboptimal<sup>6</sup>. For example, studies have demonstrated that only 40% - 60% of patients with COPD adhere with their inhaled medicines to control COPD symptoms<sup>7-9</sup>, and about 50% do not undertake physical activities regularly as recommended by the guidelines<sup>10</sup>. Similarly, over 24% of patients with COPD remain current cigarette smokers in Australia<sup>11</sup>, although smoking has been well-known as the most important risk factor for COPD<sup>12</sup>. Moreover, many patients often take a wait-and-see approach with self-management, and, hence, fail to seek timely interventions for exacerbations<sup>13</sup>. Barriers to the patient adherence are complex and multifaceted, likely including limited health knowledge, difficulty to access resources, insufficient clinical support, and lack of motivation<sup>13,14</sup>.

Recently, mobile health (mHealth) — defined as the use of mobile and wireless technologies for health care<sup>15</sup> - has become a new treatment approach which can empower self-management and enhance proactive clinical interventions<sup>16</sup>. For COPD, a number of mHealth applications are now available in the market<sup>17</sup>. Feasibility studies have demonstrated a high level of acceptance by patients<sup>18</sup> and many potential benefits such as knowledge gained, improved physical activities, reduced dyspnoea<sup>19</sup>, and ability to remotely assess COPD exacerbations<sup>20,21</sup>. A recent systematic review, evaluating outcomes from six randomised controlled trials (RCTs), demonstrated the potential to use smartphone applications to reduce COPD exacerbation rates, but at the same time indicated the limitations of studies to date, including inadequate sample sizes ( $\leq 50$ ) and heterogeneity in study design<sup>22</sup>. Therefore, additional high quality evidence remains essential to enable practical implementation of mHealth for the management of COPD in clinical settings.

In this study, we propose an innovative mHealth program for COPD (MH-COPD). The program has been specifically designed to integrate an mHealth system within an existing COPD care service to deliver all core components advocated by the evidence-based clinical guidelines in Australia. We hypothesize that the MH-COPD program would increase the self-management of COPD by patients that is consistent with guideline principles, and consequently improve health outcomes. We have therefore designed an RCT to evaluate the efficacy of the MH-COPD program.

## Methods

### *Patient and Public Involvement*

The research question on improving the self-management of COPD, and outcome measures were developed according to the clinical practice in Queensland, and suggestions from Lung Foundation Australia, a not-for-

1  
2  
3 profit organisation representing consumers with respiratory conditions. In design of the mobile health system,  
4 we employed an existing framework developed by The Australian e-Health Research Centre (Brisbane,  
5 Australia). This framework has been successfully used in a number of studies to assist patients in managing  
6 health conditions<sup>23,24</sup> and chronic diseases, including COPD<sup>20,21</sup>, diabetes<sup>25</sup>, and cardiovascular disease<sup>26,27</sup>. In  
7 this project, we also engaged with clinical nurses, general practitioners, thoracic physicians, and a group of  
8 patients with COPD in design of interventional components and user interface in the mobile app and clinician  
9 portal.  
10

11  
12 Patients with stable COPD will be recruited to examine the efficacy of the MH-COPD program. The study  
13 outcomes will be disseminated through a journal publication, approximately 6 months after finishing data  
14 collection. For the participants to be informed of the outcomes, we will send the final publication to them by  
15 email.  
16

### 17 ***Trial Design and Clinical Setting***

18  
19 The clinical trial will be a prospective, open, parallel group, two-arm RCT. We will recruit 100 patients with  
20 COPD from The Prince Charles Hospital (TPCH), Brisbane, Australia. The study flow chart is shown in Figure  
21 1. Written informed consent will be obtained. Using allocation concealment, participants will be randomised to  
22 receive either the MH-COPD program (n=50 patients) or usual care (UC-COPD) (n=50 patients) for a study  
23 duration of 6 months. All participants will be assessed at baseline, 3 months, and 6 months.  
24

25  
26 Patients with COPD attending the thoracic outpatient clinics at the hospital will be screened for eligibility. Each  
27 potential candidate will be provided with a participant information sheet about the research study and a consent  
28 form. If a candidate is willing to participate in the trial, written informed consent will be obtained. Each  
29 participant will be interviewed face-to-face by the clinical research staff (nurses or physicians) in the trial as a  
30 baseline assessment.  
31  
32  
33

### 34 ***Eligibility Criteria***

35  
36 Adult patients with COPD will be invited to participate in this trial. The inclusion criteria will be: 1) diagnosis  
37 of COPD, defined according to the international GOLD guidelines<sup>28</sup>, 2) chronic airflow limitation that is not  
38 fully reversible (post-bronchodilator FEV<sub>1</sub>/FVC <70% and FEV<sub>1</sub> <80% predicted) and 3) current or former  
39 smokers, with a smoking history of >10 pack-years.  
40

41  
42 The exclusion criteria will be: a) women who are pregnant, b) with age less than 18 years, c) with an intellectual  
43 or mental impairment, d) other comorbid lung diseases that would potentially interfere with study outcomes  
44 (predominant asthma based on physician diagnosis, active lung cancer, interstitial lung disease, severe  
45 bronchiectasis); and e) limitations to the use of mobile technology (non-correctable vision, hearing, cognitive or  
46 dexterity impairment).  
47  
48  
49

### 50 ***Randomisation***

51  
52 A series of random assignment forms with permuted blocks will be generated according to a published method  
53  
54  
55  
56  
57  
58  
59  
60

1  
2  
3 female) to ensure a balanced allocation. Assignment forms will be printed and sealed in opaque envelopes  
4 according to a predefined order. The envelopes will be stored in a secured cabinet. Following the order, the  
5 clinical research staff will open the next available envelope for each eligible participant, to reveal the  
6 assignment for the participant.  
7

8  
9 <Figure 1>

### 10 **Baseline Assessment**

11 Clinical characterisation will be undertaken at baseline:

- 12 1. **Demographics and respiratory history** will be obtained, including smoking history, respiratory  
13 symptoms, chronic bronchitis, respiratory medications, oxygen use, frequency of exacerbations of COPD  
14 requiring antibiotics and/or steroids in the past 12 months.
- 15 2. **COPD symptoms and quality of life:** The COPD Assessment Test (CAT), St George's Respiratory  
16 Questionnaire (SGRQ) and modified MRC (mMRC) dyspnoea scale will be administered.
- 17 3. **Lung function:** The most recent results for pre and post-bronchodilator spirometry, and gas transfer as  
18 physiological indicator of emphysema, will be recorded. These assessments will be performed, if they are  
19 unavailable within the previous 12 months.
- 20 4. **COPD knowledge** will be assessed with a questionnaire<sup>30</sup>, based on the content of Lung Foundation  
21 Australia resources.
- 22 5. **Questionnaire on mobile technology:** Participants will be surveyed on their attitudes and beliefs about  
23 using mobile technologies (e.g. smart phones), and will be asked about their current use of mobile phone.  
24  
25  
26  
27  
28  
29  
30  
31

### 32 **MH-COPD Intervention Group**

33 The MH-COPD program will implement an mHealth system as an intervention, in addition to usual care. The  
34 mHealth system will comprise an Android smartphone application (app) and a secure online clinician portal.  
35 Participants will be informed that the MH-COPD program is not a replacement for their usual clinical care, but  
36 is an add-on, and they should contact their general practitioner, respiratory nurse or respiratory specialist as  
37 usual if they have any concerns about their COPD. The care model of the MH-COPD program is shown in  
38 Figure 2.  
39  
40  
41  
42

43 **Resources Provided:** In the intervention group, an Android smartphone with a prepaid SIM card will be  
44 provided to each participant, with the COPD app fully installed. If a participant wishes to use his/her personal  
45 smartphone, the research staff will ensure the participant's phone is compatible with the app and then will install  
46 the app. Participants using their own personal smartphone will be provided a mobile data voucher to cover the  
47 cost of Internet data transmission. A paper-based instruction manual of the MH-COPD program will be  
48 provided to help the participant to use the app and receive interventions.  
49  
50

51 **Study Procedures and Interventions:** Each participant will be provided with an education and training session,  
52 of up to one-hour duration, to provide instructions and demonstrate how to use the app. During the session, the  
53 research staff will introduce the MH-COPD program, and will then register the participant through the online  
54 clinician portal. After the registration, an SMS message, containing the log-in formation and a website for  
55  
56  
57  
58  
59  
60

1  
2  
3 downloading the app, will be automatically sent to the participant's mobile phone. The research staff will then  
4 guide the participant to receive the message, download the app, and log into the app. After the registration, the  
5 research staff will help the participant create self-management tools, according to the COPD app functions  
6 described below:  
7

- 8  
9  
10  
11  
12  
13  
14  
15  
16  
17  
18  
19  
20  
21  
22  
23  
24  
25  
26  
27  
28  
29  
30  
31  
32  
33  
34  
35  
36  
37  
38  
39  
40  
41  
42  
43  
44  
45  
46  
47  
48  
49  
50  
51  
52  
53  
54  
55  
56  
57  
58  
59  
60
- A. Health education: Ten video clips will be automatically provided to the participants via the app at scheduled times (Figure 3A), at a rate of two videos per week for the first 5 weeks. The video clips have been prepared and validated by Lung Foundation Australia<sup>31</sup>. Through the video clips, participants will gain essential knowledge on ten topics: 1) Managing your lung disease, 2) How do your lungs work? 3) Managing your breathlessness, 4) Managing treatment options, 5) Questions you can ask your health professional, 6) Who is your healthcare team? 7) Managing your fatigue and energy conservation, 8) Tips for looking after yourself and your condition, 9) Benefits of exercise programs and ongoing support, and 10) Supportive care and end-of-life issues. The duration of each video clip ranges from 6 to 12 minutes. The video clips are integrated in the app, and after each video, a questionnaire will be given to help participants self-assess the knowledge obtained. Links to the webpages of Lung Foundation Australia, Asthma Australia and the Australian Government Quitline for smoking cessation will be included in the app, to enable direct access from the smartphone to these sites.
- B. Symptom monitoring: Participants will use the app each day to self-manage COPD symptoms, including breathlessness, cough, sputum colour, sputum volume, and wheezing (Figure 3B). The severity levels of the symptoms will be predefined, and scored on the app. The recorded symptoms of individual participants will be automatically compared with those in the previous day. If two or more symptoms of a participant are detected with increased scores, the participant will be notified via an automated smartphone notification to use an electronic COPD action plan in the app.
- C. Electronic COPD action plan: Participants will work through an electronic COPD action plan in the app on a daily basis. The action plan will contain 3 sections based on symptom severity: danger signs (Figure 3C), signs of a flare-up, and staying well. It will contain recommendations for medicines prescribed for worsening symptoms and exacerbations. The medicines will include bronchodilators, antibiotics and oral steroids, and will be entered into the action plan in the app by the research staff during the education and training session. The sections and corresponding recommendations in the app will replicate a paper-based COPD action plan clinically validated and used in Queensland Health.
- D. Physical activity: The app will use inbuilt motion sensors in the smartphone to automatically record walking steps. Participants will be asked to carry the smartphone with the app during normal activity in waking hours in order to capture walking activity. An initial personal goal for steps to walk will be prescribed<sup>32</sup> for each participant, and this goal will be automatically increased in the first 4 weeks. Motivational messages will also be automatically sent to the participant according to the number of steps and goal achievement each day.
- E. Smoking cessation: For current smokers, the participants will use the app to record the number of cigarettes consumed each day, triggers and cues for smoking cigarettes, attempts to reduce cigarettes, and use of pharmacotherapy (such as nicotine replacement or varenicline). A goal of the maximum number of cigarettes consumed each day will be provided to each participant. The goal of cigarettes smoked will be



1  
2  
3 automatically reduced down to zero through the first six-week time period. Motivational messages will be  
4 automatically generated and sent according to the number of cigarettes recorded daily and the goal  
5 achievement through the 6-week period.  
6

- 7 F. Inhaler technique: The participants will use the app to review videos to learn to how to use inhalers  
8 correctly. The videos have been prepared and validated by Lung Foundation Australia<sup>33</sup> and will be  
9 preloaded in the app, according to inhalers prescribed to individual participants. Videos of each participant  
10 actually using their inhalers will also be recorded by the research staff during the education and training  
11 session, and stored in the app for the participant to review.  
12  
13

14 **Monitoring of Patient Adherence:** All the data entries of the participants recorded via the app, such as  
15 symptoms, the action plan, and cigarettes, will be automatically uploaded to the online portal and analysed to  
16 assess the patient adherence. If a participant does not adhere to program for two days, alerts will be generated in  
17 the portal, and automated motivational messages will be sent to the participant via app notifications. The  
18 research staff will review the alerts in the portal and accordingly contact the participant to troubleshoot the  
19 nonadherence.  
20  
21  
22

23 **Diary Card for Exacerbations:** Participants will keep a hard copy diary to record exacerbations and hospital  
24 admissions during the study. A COPD exacerbation will be defined as an increase in respiratory symptoms  
25 requiring treatment with systemic steroids and/or antibiotics<sup>34</sup>. Participants will record the start and end date of  
26 treatment for the exacerbation. The research staff based at The Prince Charles Hospital will phone each  
27 participant at 2 weeks, 2 months and 4 months, to ensure adherence to the exacerbation diary and reporting of  
28 exacerbations, as well as adherence to the app. The data in the diary will be collected and analysed to assess the  
29 frequency, duration and severity of exacerbations in the participants.  
30  
31  
32

33 <Figure 2>

34 <Figure 3>

### 35 36 37 **Usual Care Group**

38 **Usual care:** Participants in the usual care (UC-COPD) group will receive standard care from respiratory clinics  
39 and primary care, throughout the trial period.  
40

41 **Resources provided:** No COPD app will be provided to the usual care group. A standard care package will be  
42 provided to help participants with usual care, including general written advice about health education, the COPD  
43 action plan, symptom monitoring, physical activity, smoking cessation and inhaler technique. In the package,  
44 the information on the self-management of COPD from the Lung Foundation Australia and the corresponding  
45 web address will be provided.  
46  
47  
48

49 **Study procedures:** After randomization and baseline assessment, the research staff will train the participant on  
50 study procedures and take them through the instruction manual. These training and procedures will be the same  
51 as those provided in usual care in Queensland Health.  
52

53 **Diary card for exacerbations:** Participants will keep a written, hard copy diary to record exacerbations and  
54 hospital admissions during the study, similar to the methods described in the Intervention group.  
55  
56  
57  
58  
59  
60

## Outcomes

The outcome measures of the study are shown in Table 1. The primary outcome measures will be COPD symptoms and quality of life, assessed by the CAT<sup>35</sup>, St George's Respiratory Questionnaire (SGRQ)<sup>36</sup> and mMRC<sup>37</sup> questionnaires at the baseline and 6-month time point. The secondary outcomes will include the inhaled medicine adherence (Test of the Adherence to Inhalers, TAI)<sup>38</sup>, smoking cessation, and physical activity by Global Physical Activity Questionnaire (GPAQ)<sup>39</sup>. Smoking cessation will be defined as zero cigarettes smoked in the last 7 days of the 6 month follow-up period after commencement of the intervention, as assessed through the self-reported diary. To assess the risk of COPD exacerbation, we will analyse the rate of COPD exacerbations recorded in the diary and MH-COPD system. Additionally, we will assess the health care utilizations relevant to hospital readmissions and visits of the emergency department. These events will be obtained from the hospital information systems in the trial.

For the participants in the MH-COPD group, we will report the adherence quantified by the daily data entries recommended, and user experience assessed by a questionnaire previously applied in a previous mobile health based study<sup>25</sup>.

**Table 1.** Study outcome measures and assessment tools and data resources.

| Primary Outcome                   | Baseline | Six months | Methods/Instruments                                                                                      |
|-----------------------------------|----------|------------|----------------------------------------------------------------------------------------------------------|
| COPD symptoms and quality of life | Y        | Y          | CAT, SGRQ and mMRC                                                                                       |
| <b>Secondary Outcomes</b>         |          |            |                                                                                                          |
| COPD knowledge                    | Y        | Y          | Lung Foundation Australia questionnaire on COPD knowledge                                                |
| Inhaled medicine adherence        | Y        | Y          | TAI questionnaire                                                                                        |
| Use of COPD action plan           | N        | Y          | Self-reported in diary                                                                                   |
| Smoking cessation                 | Y        | Y          | Self-reported in diary                                                                                   |
| Physical activity                 | Y        | Y          | GPAQ (both groups), step count (intervention group)                                                      |
| Exacerbation rate                 | N        | Y          | Exacerbations recorded on hard copy exacerbation diary (both groups) and on the app (intervention group) |
| Health care utilisation           | N        | Y          | Hospital readmissions and visits to the emergency department via hospital information systems            |
| User experience of the mobile app | N        | Y          | Questionnaire (intervention group).                                                                      |

## Sample Size

The sample size has been calculated based on the co-primary outcomes of the CAT score and SGRQ score. 100 patients, randomised 1:1 to intervention (MH-COPD) or usual care (UC-COPD), will have 80% power at

1  
2  
3 significance level (alpha) of 0.05 to detect a clinically important reduction of 3 in the CAT score<sup>40</sup> (primary  
4 outcome) in ~50% of intervention patients, compared to 20% in the control group, even with 40 patients in each  
5 final group (allowing for up to 20% withdrawal). In addition, this sample size will have 80% power at  
6 significance level (alpha) of 0.05 to detect a relative risk of 2 for a clinically important increase in SGRQ of 4  
7 (co-primary outcome) in the intervention group, given a proportion of 30% of the control group achieving this  
8 with usual care, even with 40 patients in each final group (allowing for up to 20% withdrawal).  
9  
10

### 11 ***Blinding***

12  
13 This is an open randomized controlled trial, due to the difficulty in effectively blinding participants and clinical  
14 researchers to the treatment groups. Data analysis of outcomes based on questionnaires and diary cards  
15 (common to both groups) will be analysed by a researcher not directly involved with recruitment and follow-up.  
16 In the analysis, only de-identified data will be provided.  
17  
18

### 19 ***Data Collection and Storage***

20  
21 The research staff will interview each participant at baseline to collect the data patient characteristics and  
22 conduct the assessments for those questionnaire-based outcomes. During the interview, the participant will  
23 receive paper-based assessment forms (questionnaires), and will be given sufficient time for completion of  
24 these. The completeness of each questionnaire will be checked at the end of the interview by the research staff  
25 for quality purposes.  
26  
27

28 All study files, including the questionnaire forms, master list of participants, and case report forms, will be  
29 stored securely, either in password-protected computer files (for electronic files) or in locked filing cabinets (for  
30 hard copies) in a secure area. Access to these files will only be granted to the study personnel trained in  
31 confidentiality and privacy procedures. All trial data provided for research analysis will be de-identified,  
32 including patient characteristics, primary and secondary outcomes, and data entries through the online portal  
33 systems used in the study.  
34  
35

36 All the trial files and data will be stored securely for a minimum of 5 years after completion of the study and,  
37 finally, be securely destroyed according to the Australian National Health and Medical Research Council code  
38 for responsible conduct of research guidelines<sup>41</sup>.  
39  
40

### 41 ***Strategies for Participant Retention***

42  
43 Prior to the trial recruitment, the research team will discuss the importance of participant retention within the  
44 recruitment and care teams. During the trial, each participant will be provided with a telephone contact in the  
45 information package. Accordingly, the participants can contact the research staff for trial-related support. A  
46 structured procedure and log files will be in place to guide the research staff to document the participants'  
47 enquiries, and ensure timely responses and/or follow-ups. Additionally, we will reimburse the participants for  
48 trial-related expenses including Android smartphone handsets if needed, mobile Internet costs, and parking fees  
49 for interviews and assessments.  
50  
51  
52

### 53 ***Statistical Methods***

54 All participants randomized into this study will be included in the final comparative analysis on an intention-to-  
55 treat basis. A  $\chi^2$  test will be used to compare categorical variables between the MH-COPD and UC-COPD  
56  
57  
58  
59  
60

1  
2  
3 group. ANOVA will be applied to compare continuous variables between the groups. We will also analyse  
4 fluctuations of monitored symptoms to predict COPD exacerbations for early intervention. In this predictive  
5 analysis, we will use a nonlinear regression method, such as the exponential regression model previously  
6 applied<sup>20</sup>, to analyse the relationship between the changes in symptoms and occurrence of exacerbations. In  
7 these comparison and analysis methods, a p-value less than 0.05 (two-tailed) will be considered statistically  
8 significant. The analysis will be adjusted for confounding variables including age and sex. We will mainly use  
9 SPSS version 23 for the statistical analysis. Missing data at the case level will be imputed using a multiple  
10 imputation method implemented in SPSS.  
11  
12

### 13 ***Trial Management***

14  
15 A trial steering committee will convene monthly (with additional meetings if needed) and take overall  
16 responsibility for the conduct of the trial. The committee will comprise representatives of the chief investigators,  
17 research staff and project managers from the collaborating organizations. The responsibilities of the committee  
18 include managing the trial progress, reviewing adverse events, resolving technical issues, monitoring trial data,  
19 providing reports to the project sponsors and ethics committees, and deciding budget and administration issues.  
20 If necessary, the committee will advise and make changes to the clinical trial protocol. The committee will be  
21 independent from project sponsors and free from competing interests.  
22  
23  
24

### 25 ***Trial Monitoring***

26  
27 A data monitoring committee (DMC), comprising four clinical researchers not directly involved in the study,  
28 will evaluate safety throughout the trial. The DMC will be independent from the trial sponsors and competing  
29 interests. The DMC will convene every 3 months (with additional meetings if needed) to review the risks and  
30 severity of adverse events or incidents reported. The DMC will assess the severity of adverse events and/or  
31 incidents, and provide recommendations if needed. If there are substantial differences in rates of serious adverse  
32 events (including mortality) or hospitalisation between the MH-COPD and UC-COPD groups, DMC may  
33 recommend a formal interim statistical analysis and, according, recommend whether the study should be  
34 terminated early.  
35  
36  
37  
38

### 39 **Discussion**

40  
41 Currently many mobile apps for COPD are available in the market, but they often have limited features or  
42 focuses<sup>17</sup>. Importantly, the clinical evidence on the efficacy and effectiveness is generally absent<sup>17,22,42</sup>.  
43 Recently, several RCT studies evaluated potential benefits to use mHealth for COPD, but they are normally  
44 limited by small sample sizes (n≤100) and narrow scopes, such as intervention of worsening COPD symptoms  
45<sup>43-45</sup>, physical activities<sup>19,46,47</sup> or impacts of environment/climate change<sup>48</sup>. Moreover, many mHealth studies for  
46 COPD have been found with many issues, such as high drop-out rates (20%<sup>45</sup>, 33%<sup>47</sup> and 36%<sup>19</sup>), large  
47 variations of patient adherence (20%<sup>47</sup> to 98%<sup>44</sup> adherence rates), and inconsistent user experience (mixed with  
48 technical challenges<sup>19</sup> and good satisfactions<sup>47</sup>). Therefore, further clinical validation remains essential to use  
49 the mHealth for improving COPD care.  
50  
51  
52

53 The MH-COPD program has been deliberately designed to overcome those barriers stated before, and to focus  
54 on improving patient adherence to the self-management, consistent with the evidence-based clinical guidelines<sup>4</sup>.  
55 In the program, patients will use a mobile app to conveniently access educational videos to gain essential  
56  
57  
58  
59

1  
2  
3 knowledge and skills as recommended by the guidelines. The app will also assist the patients in monitoring  
4 COPD symptoms and risk factors (low physical activity and smoking of cigarettes). Patients will interact with  
5 the electronic COPD action plan to make decision for significant changes in the symptoms; and receive  
6 automated motivational messages for modification of the risk factors. The patients' data, including monitoring  
7 symptoms, risk factors and adherence, will be automatically uploaded to the portal. Using the portal, the care  
8 providers are able to remotely monitor the patient conditions and adherence, and accordingly provide timely  
9 interventions. Compared with the paper based approach in usual care, the use of mHealth would make it easier  
10 and simpler for the patients to access clinical resources and self-manage COPD. Additionally, it would allow the  
11 care providers to actively engage with the patients in COPD care. Therefore, we expect the MH-COPD program  
12 to improve the patient compliance and health outcomes.

13  
14  
15  
16 Different from many existing studies, our MH-COPD program was designed to include all core components  
17 outlined by the evidence-based guidelines in Australia, and integrate within COPD clinics. Additionally, the  
18 program aims at improving patient self-management. Although the nurses and COPD physicians in the program  
19 will review the patients' data through the clinician portal, their interventions mainly focus on supporting and  
20 motivating patients to adhere to the program. Additionally, many automated messages and alerts will provided  
21 through the mHealth system to support the intervention. Therefore, the burden to the clinicians in the program  
22 would be minimum. In all, the MH-COPD study will provide a unique opportunity to help understand the  
23 potential to use mobile health innovations to improve patient self-management and health outcomes, and hence  
24 add evidence for the effectiveness of using mobile health to improve COPD care in the community.

### 25 26 27 28 29 **Summary**

30  
31 The study will specifically integrate an innovative mHealth system with a clinical COPD service and evaluate  
32 this approach through a RCT. The evaluation will provide a unique opportunity to improve COPD care in the  
33 community through mobile health innovations.  
34  
35  
36  
37

### 38 **Figure Legends:**

39  
40 Figure 1. Study flow chart of the randomized controlled trial designed to evaluate the MH-COPD program.

41 UC=usual care, MH=mobile health.  
42

43  
44 Figure 2. The care model of the MH-COPD program includes the components of health education, electronic  
45 COPD action plan, symptom monitoring, physical activity, smoking cessation, and inhaler technique.  
46

47  
48 Figure 3. Selected screenshots showing the user interface of the mobile application. A: Scheduled educational  
49 videos preloaded in the app. B: User interface to record symptoms and risk factors. C: User interface showing an  
50 assessment of symptoms in the COPD action plan.  
51  
52  
53  
54

### 55 **Author contributions**

56  
57  
58  
59  
60

1  
2  
3 This study protocol was developed by I.Y. and H.D. The first draft of the manuscript was written by I.Y. and  
4 H.D. All authors contributed to design of the clinical study and critical revision of the manuscript.  
5  
6  
7  
8  
9  
10  
11  
12  
13  
14  
15  
16  
17  
18  
19  
20  
21  
22  
23  
24  
25  
26  
27  
28  
29  
30  
31  
32  
33  
34  
35  
36  
37  
38  
39  
40  
41  
42  
43  
44  
45  
46  
47  
48  
49  
50  
51  
52  
53  
54  
55  
56  
57  
58  
59  
60

For peer review only

## Funding

This project is funded by The Prince Charles Hospital Foundation, Brisbane, Australia (Experienced Researcher grant no. ER2015-21).

## Conflicts of interest

There are no conflicts of interest in this project.

## Acknowledgement

The authors gratefully acknowledge the patients and staff of The Prince Charles Hospital for their involvement in this study, and contributors to the video clips prepared by Lung Foundation Australia.

## References

1. Ferkol T, Schraufnagel D. The global burden of respiratory disease. *Annals of the American Thoracic Society* 2014; **11**(3): 404-6.
2. Harries TH, Thornton H, Crichton S, Schofield P, Gilkes A, White PT. Hospital readmissions for COPD: a retrospective longitudinal study. *NPJ primary care respiratory medicine* 2017; **27**(1): 31.
3. Shah T, Churpek MM, Coca Perrillon M, Konetzka RT. Understanding why patients with COPD get readmitted: a large national study to delineate the Medicare population for the readmissions penalty expansion. *Chest* 2015; **147**(5): 1219-26.
4. Yang IA, Brown JL, George J, et al. COPD-X Australian and New Zealand guidelines for the diagnosis and management of chronic obstructive pulmonary disease: 2017 update. *Med J Aust* 2017; **207**(10): 436-42.
5. World Health Organization. COPD management. <http://www.who.int/respiratory/copd/management/en/> (accessed 11 November 2017).
6. Martin LR, Williams SL, Haskard KB, DiMatteo MR. The challenge of patient adherence. *Therapeutics and Clinical Risk Management* 2005; **1**(3): 189-99.
7. Cecere LM, Slatore CG, Uman JE, et al. Adherence to long-acting inhaled therapies among patients with chronic obstructive pulmonary disease (COPD). *Copd* 2012; **9**(3): 251-8.
8. Restrepo RD, Alvarez MT, Wittnebel LD, et al. Medication adherence issues in patients treated for COPD. *Int J Chron Obstruct Pulmon Dis* 2008; **3**(3): 371-84.
9. Ingebrigtsen TS, Marott JL, Nordestgaard BG, et al. Low Use and Adherence to Maintenance Medication in Chronic Obstructive Pulmonary Disease in the General Population. *Journal of General Internal Medicine* 2015; **30**(1): 51-9.
10. Davis AH. Exercise adherence in patients with chronic obstructive pulmonary disease: an exploration of motivation and goals. *Rehabil Nurs* 2007; **32**(3): 104-10.
11. Welfare AIoH. COPD, associated comorbidities and risk factors. 2016. <https://www.aihw.gov.au/reports/asthma-other-chronic-respiratory-conditions/copd-associated-comorbidities-and-risk-factors/contents/risk-factors-associated-with-copd> (accessed 27/11/2017 by HD 2017).
12. Tashkin DP, Murray RP. Smoking cessation in chronic obstructive pulmonary disease. *Respir Med* 2009; **103**(7): 963-74.
13. Horie J, Murata S, Hayashi S, et al. Factors that delay COPD detection in the general elderly population. *Respir Care* 2011; **56**(8): 1143-50.
14. Sanduzzi A, Balbo P, Candoli P, et al. COPD: adherence to therapy. *Multidisciplinary Respiratory Medicine* 2014; **9**(1): 60.
15. Agarwal S, LeFevre AE, Lee J, et al. Guidelines for reporting of health interventions using mobile phones: mobile health (mHealth) evidence reporting and assessment (mERA) checklist. *Bmj* 2016; **352**: i1174.
16. World Health Organisation. mHealth New horizons for health through mobile technologies. 2011. [http://www.who.int/goe/publications/goe\\_mhealth\\_web.pdf](http://www.who.int/goe/publications/goe_mhealth_web.pdf) (accessed 1 July 2017).

17. Sobnath DD, Philip N, Kayyali R, et al. Features of a Mobile Support App for Patients With Chronic Obstructive Pulmonary Disease: Literature Review and Current Applications. *JMIR Mhealth Uhealth* 2017; **5**(2): e17.
18. Joe J, Demiris G. Older adults and mobile phones for health: a review. *J Biomed Inform* 2013; **46**(5): 947-54.
19. Nguyen HQ, Donesky-Cuenco D, Wolpin S, et al. Randomized controlled trial of an internet-based versus face-to-face dyspnea self-management program for patients with chronic obstructive pulmonary disease: pilot study. *J Med Internet Res* 2008; **10**(2): e9.
20. Ding H, Karunanithi M, Kanagasingam Y, Vignarajan J, Moodley Y. A pilot study of a mobile-phone-based home monitoring system to assist in remote interventions in cases of acute exacerbation of COPD. *J Telemed Telecare* 2014; **20**(3): 128-34.
21. Ding H, Moodley Y, Kanagasingam Y, Karunanithi M. A mobile-health system to manage chronic obstructive pulmonary disease patients at home. *Conf Proc IEEE Eng Med Biol Soc* 2012; **2012**: 2178-81.
22. Alwashmi M, Hawboldt J, Davis E, Marra C, Gamble JM, Abu Ashour W. The Effect of Smartphone Interventions on Patients With Chronic Obstructive Pulmonary Disease Exacerbations: A Systematic Review and Meta-Analysis. *JMIR Mhealth Uhealth* 2016; **4**(3): e105.
23. Duncan M, Vandelanotte C, Kolt GS, et al. Effectiveness of a Web- and Mobile Phone-Based Intervention to Promote Physical Activity and Healthy Eating in Middle-Aged Males: Randomized Controlled Trial of the ManUp Study. *Journal of Medical Internet Research* 2014; **16**(6): e136.
24. Ding H, Karunanithi M, Duncan M, Ireland D, Noakes M, Hooker C. A mobile phone enabled health promotion program for middle-aged males. *Conf Proc IEEE Eng Med Biol Soc* 2013; **2013**: 1173-6.
25. Ding H, Fatehi F, Russell AW, et al. User Experience of an Innovative Mobile Health Program to Assist in Insulin Dose Adjustment: Outcomes of a Proof-of-Concept Trial. *TELEMEDICINE and e-HEALTH* 2018; **24**(7).
26. Walters DL, Sarela A, Fairfull A, et al. A mobile phone-based care model for outpatient cardiac rehabilitation: the care assessment platform (CAP). *BMC Cardiovasc Disord* 2010; **10**: 5.
27. Varnfield M, Karunanithi M, Lee C-K, et al. Smartphone-based home care model improved use of cardiac rehabilitation in postmyocardial infarction patients: results from a randomised controlled trial. *Heart* 2014.
28. Global Initiative for Chronic Obstructive Lung Disease I. GLOBAL INITIATIVE FOR CHRONIC OBSTRUCTIVE LUNG DISEASE POCKET GUIDE TO COPD DIAGNOSIS, MANAGEMENT, AND PREVENTION: A Guide for Health Care Professionals 2017 EDITION. 2017. <http://goldcopd.org/wp-content/uploads/2016/12/wms-GOLD-2017-Pocket-Guide.pdf> (accessed 11 November 2017).
29. Doig GS, Simpson F. Randomization and allocation concealment: a practical guide for researchers. *J Crit Care* 2005; **20**(2): 187-91; discussion 91-3.
30. Lung Foundation Australia. C.O.P.E. Pre-Program Knowledge Questionnaire 2018. <http://cope.lungfoundation.com.au/course/viewCourse/cid,26.html> (accessed 9 February 2018).
31. Lung Foundation Australia. Living with a lung condition. <https://lungfoundation.com.au/patient-support/living-with-a-lung-condition/self-management/> (accessed 11 November 2017).
32. Nolan CM, Maddocks M, Canavan JL, et al. Pedometer Step Count Targets during Pulmonary Rehabilitation in Chronic Obstructive Pulmonary Disease. A Randomized Controlled Trial. *Am J Respir Crit Care Med* 2017; **195**(10): 1344-52.
33. Lung Foundation Australia. Inhaler device technique. <https://lungfoundation.com.au/patient-support/copd/inhaler-technique-fact-sheets/> (accessed 11 November 2017).
34. Global Initiative for Chronic Obstructive Lung Disease Inc. GLOBAL STRATEGY FOR THE DIAGNOSIS, MANAGEMENT, AND PREVENTION OF CHRONIC OBSTRUCTIVE PULMONARY DISEASE (2018 REPORT), 2018.
35. Jones PW, Harding G, Berry P, Wiklund I, Chen WH, Kline Leidy N. Development and first validation of the COPD Assessment Test. *Eur Respir J* 2009; **34**(3): 648-54.
36. Jones PW, Quirk FH, Baveystock CM, Littlejohns P. A self-complete measure of health status for chronic airflow limitation. The St. George's Respiratory Questionnaire. *The American review of respiratory disease* 1992; **145**(6): 1321-7.
37. Bestall J, Paul E, Garrod R, Garnham R, Jones P, Wedzicha J. Usefulness of the Medical Research Council (MRC) dyspnoea scale as a measure of disability in patients with chronic obstructive pulmonary disease. *Thorax* 1999; **54**(7): 581-6.
38. Plaza V, Fernandez-Rodriguez C, Melero C, et al. Validation of the 'Test of the Adherence to Inhalers' (TAI) for Asthma and COPD Patients. *J Aerosol Med Pulm Drug Deliv* 2016; **29**(2): 142-52.
39. World Health Organization. Global Physical Activity Questionnaire (GPAQ v2.0). 2002. [http://www.who.int/chp/steps/resources/GPAQ\\_Analysis\\_Guide.pdf](http://www.who.int/chp/steps/resources/GPAQ_Analysis_Guide.pdf) (accessed 9 February 2018).



- 1  
2  
3 40. Smid DE, Franssen FM, Houben-Wilke S, et al. Responsiveness and MCID Estimates for CAT, CCQ,  
4 and HADS in Patients With COPD Undergoing Pulmonary Rehabilitation: A Prospective Analysis. *Journal of*  
5 *the American Medical Directors Association* 2017; **18**(1): 53-8.
- 6 41. National Health and Medical Research Council. Statement and Guidelines on Research Practice 1997.  
7 <https://www.nhmrc.gov.au/guidelines-publications/r24> (accessed 11 November 2017).
- 8 42. Velardo C, Shah SA, Gibson O, et al. Digital health system for personalised COPD long-term  
9 management. *BMC Med Inform Decis Mak* 2017; **17**(1): 19.
- 10 43. Halpin DM, Laing-Morton T, Spedding S, et al. A randomised controlled trial of the effect of  
11 automated interactive calling combined with a health risk forecast on frequency and severity of exacerbations of  
12 COPD assessed clinically and using EXACT PRO. *Primary care respiratory journal : journal of the General*  
13 *Practice Airways Group* 2011; **20**(3): 324-31, 2 p following 31.
- 14 44. Farmer A, Williams V, Velardo C, et al. Self-Management Support Using a Digital Health System  
15 Compared With Usual Care for Chronic Obstructive Pulmonary Disease: Randomized Controlled Trial. *J Med*  
16 *Internet Res* 2017; **19**(5): e144.
- 17 45. Pedone C, Chiurco D, Scarlata S, Incalzi RA. Efficacy of multiparametric telemonitoring on respiratory  
18 outcomes in elderly people with COPD: a randomized controlled trial. *BMC Health Serv Res* 2013; **13**: 82.
- 19 46. Liu WT, Wang CH, Lin HC, et al. Efficacy of a cell phone-based exercise programme for COPD. *Eur*  
20 *Respir J* 2008; **32**(3): 651-9.
- 21 47. Tabak M, Brusse-Keizer M, van der Valk P, Hermens H, Vollenbroek-Hutten M. A telehealth program  
22 for self-management of COPD exacerbations and promotion of an active lifestyle: a pilot randomized controlled  
23 trial. *International Journal of Chronic Obstructive Pulmonary Disease* 2014; **9**: 935-44.
- 24 48. Jehn M, Donaldson G, Kiran B, et al. Tele-monitoring reduces exacerbation of COPD in the context of  
25 climate change--a randomized controlled trial. *Environmental health : a global access science source* 2013; **12**:  
26 99.
- 27  
28  
29  
30  
31  
32  
33  
34  
35  
36  
37  
38  
39  
40  
41  
42  
43  
44  
45  
46  
47  
48  
49  
50  
51  
52  
53  
54  
55  
56  
57  
58  
59  
60

1  
2  
3  
4  
5  
6  
7  
8  
9  
10  
11  
12  
13  
14  
15  
16  
17  
18  
19  
20  
21  
22  
23  
24  
25  
26  
27  
28  
29  
30  
31  
32  
33  
34  
35  
36  
37  
38  
39  
40  
41  
42  
43  
44  
45  
46  
47  
48  
49  
50  
51  
52  
53  
54  
55  
56  
57  
58  
59  
60

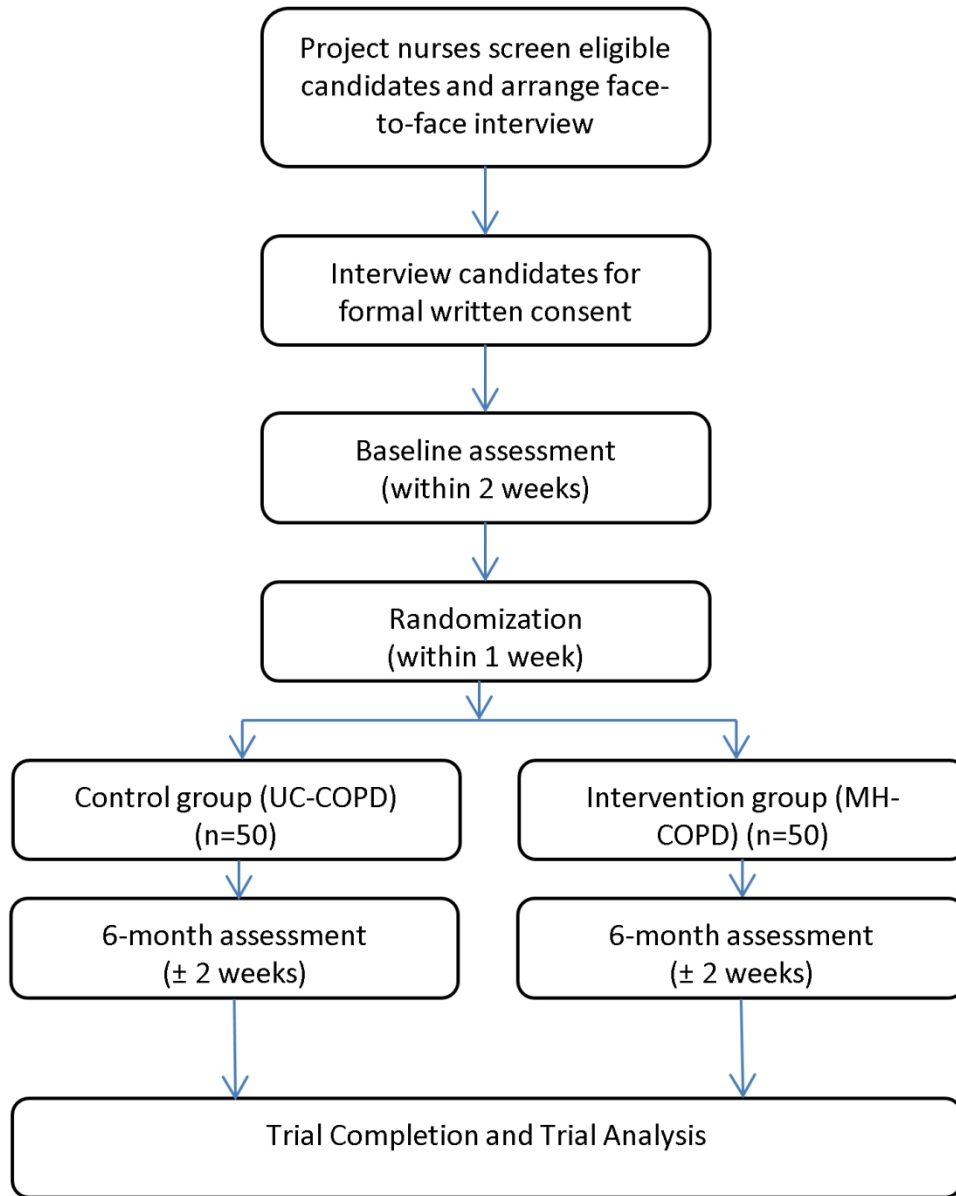

Figure 1. Study flow chart of the randomized controlled trial designed to evaluate the MH-COPD program. UC=usual care, MH=mobile health.

121x151mm (300 x 300 DPI)

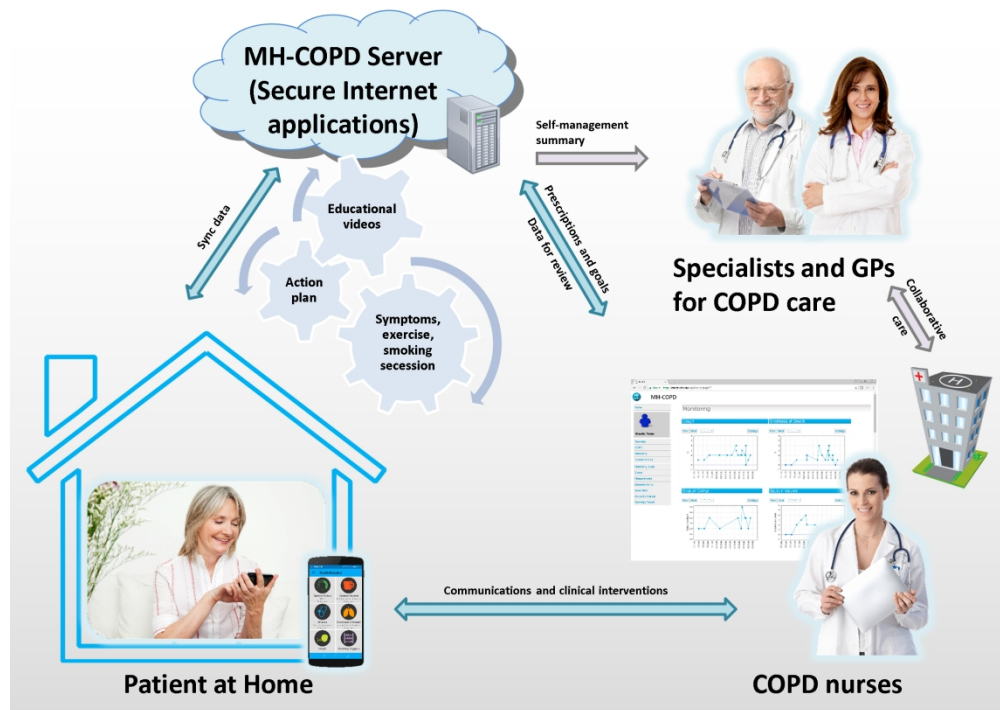

Figure 2. The care model of the MH-COPD program includes the components of health education, electronic COPD action plan, symptom monitoring, physical activity, smoking cessation, and inhaler technique.

215x154mm (300 x 300 DPI)

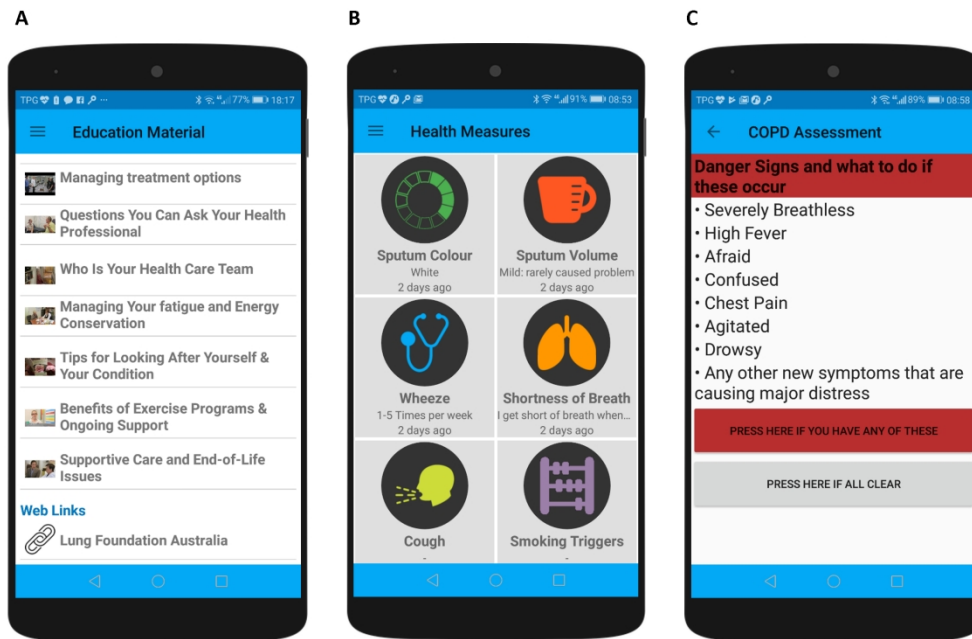

Figure 3. Selected screenshots showing the user interface of the mobile application. A: Scheduled educational videos preloaded in the app. B: User interface to record symptoms and risk factors. C: User interface showing an assessment of symptoms in the COPD action plan.

233x152mm (300 x 300 DPI)

# BMJ Open

## Evaluation of an innovative mobile health program for the self-management of chronic obstructive pulmonary disease (MH-COPD): protocol of a randomized controlled trial

|                                 |                                                                                                                                                                                                                                                                                                                                                                                                                                                                                                                                                                                                                                                                                                                                                                                                                                                                                                                                                |
|---------------------------------|------------------------------------------------------------------------------------------------------------------------------------------------------------------------------------------------------------------------------------------------------------------------------------------------------------------------------------------------------------------------------------------------------------------------------------------------------------------------------------------------------------------------------------------------------------------------------------------------------------------------------------------------------------------------------------------------------------------------------------------------------------------------------------------------------------------------------------------------------------------------------------------------------------------------------------------------|
| Journal:                        | <i>BMJ Open</i>                                                                                                                                                                                                                                                                                                                                                                                                                                                                                                                                                                                                                                                                                                                                                                                                                                                                                                                                |
| Manuscript ID                   | bmjopen-2018-025381.R1                                                                                                                                                                                                                                                                                                                                                                                                                                                                                                                                                                                                                                                                                                                                                                                                                                                                                                                         |
| Article Type:                   | Protocol                                                                                                                                                                                                                                                                                                                                                                                                                                                                                                                                                                                                                                                                                                                                                                                                                                                                                                                                       |
| Date Submitted by the Author:   | 09-Jan-2019                                                                                                                                                                                                                                                                                                                                                                                                                                                                                                                                                                                                                                                                                                                                                                                                                                                                                                                                    |
| Complete List of Authors:       | Ding, Hang; CSIRO, The Australian eHealth Research Centre<br>Karunanithi, Mohan; CSIRO, The Australian e-Health Research Centre<br>Ireland, Derek; The Australia eHealth Research Centre<br>McCarthy, Lisa; The Prince Charles Hospital, Metro North Hospital and Health Service<br>Hakim, Rekha; The Prince Charles Hospital, Metro North Hospital and Health Service<br>Phillips, Kirsten; Lung Foundation Australia<br>Pradhan , Rahul ; The Prince Charles Hospital, Metro North Hospital and Health Service<br>Seah, E-Hong ; The Prince Charles Hospital , Metro North Hospital and Health Service<br>Bowman, Rayleen ; The Prince Charles Hospital, Metro North Hospital and Health Service<br>Fong, Kwun; Prince Charles Hospital, Thoracic Research Centre<br>Masel, Philip ; The Prince Charles Hospital, Metro North Hospital and Health Service<br>Yang, Ian; The Prince Charles Hospital, Metro North Hospital and Health Service |
| <b>Primary Subject Heading</b>: | Health services research                                                                                                                                                                                                                                                                                                                                                                                                                                                                                                                                                                                                                                                                                                                                                                                                                                                                                                                       |
| Secondary Subject Heading:      | Health services research, Research methods                                                                                                                                                                                                                                                                                                                                                                                                                                                                                                                                                                                                                                                                                                                                                                                                                                                                                                     |
| Keywords:                       | Chronic pulmonary obstructive disease, randomized controlled trial, self-management, mobile health                                                                                                                                                                                                                                                                                                                                                                                                                                                                                                                                                                                                                                                                                                                                                                                                                                             |
|                                 |                                                                                                                                                                                                                                                                                                                                                                                                                                                                                                                                                                                                                                                                                                                                                                                                                                                                                                                                                |

SCHOLARONE™  
Manuscripts

Evaluation of an innovative mobile health program for the self-management of chronic obstructive pulmonary disease (MH-COPD): protocol of a randomized controlled trial

Hang DING<sup>a,1</sup>, Mohan KARUNANITHI<sup>a</sup>, Derek IRELAND<sup>a</sup>, Lisa MCCARTHY<sup>b</sup>, Rekha HAKIM<sup>b</sup>, Kirsten PHILLIPS<sup>d</sup>, Rahul PRADHAN<sup>bc</sup>, E-Hong SEAH<sup>bc</sup>, Rayleen V. BOWMAN<sup>bc</sup>, Kwun M. FONG<sup>bc</sup>, Philip J. MASEL<sup>bc</sup>, Ian A. YANG<sup>bc</sup>

<sup>a</sup> *The Australian e-Health Research Centre, CSIRO, Brisbane, Australia*

<sup>b</sup> *The Prince Charles Hospital, Metro North Hospital and Health Service, Brisbane, Australia.*

<sup>c</sup> *University of Queensland Thoracic Research Centre, Faculty of Medicine, The University of Queensland, Brisbane, Australia*

<sup>d</sup> *Lung Foundation Australia, Brisbane, Australia*

## Abstract

**Introduction:** Chronic obstructive pulmonary disease (COPD) is the fourth leading cause of death globally. In outpatient care, the self-management of COPD is essential, but patient adherence to this remains suboptimal. The objective of this study is to examine whether an innovative mobile health (mHealth)-enabled care program (MH-COPD) will improve the patient self-management and relevant health outcomes.

**Methods and Analysis:** A prospective open randomized controlled trial (RCT) has been designed. In the trial, patients with COPD will be recruited from The Prince Charles Hospital, Brisbane, Australia. They will then be randomized to participate in either the MH-COPD intervention group (n=50 patients), or usual care control group (UC-COPD) (n=50 patients) for 6 months. The MH-COPD program has been designed to integrate an mHealth system within a clinical COPD care service. In the program, participants will use a mobile health application at home to review educational videos, monitor COPD symptoms, use an electronic action plan, modify the risk factors of cigarette smoking and regular physical activity, and learn to use inhalers optimally. All participants will be assessed at baseline, 3 months and 6 months. The primary outcomes will be COPD symptoms and quality of life. The secondary outcomes will be patient adherence, physical activity, smoking cessation, use of COPD medicines, frequency of COPD exacerbations and hospital readmissions, and user experience of the mobile app.

## Ethics and Dissemination

The clinical trial has been approved by The Prince Charles Hospital Human Research Ethics Committee (HREC/16/QPCH/252), and registered in the Australian New Zealand Clinical Trials Registry (Trial ID: ACTRN12618001091291). The recruitment and follow-up of the trial will be from Jan 2019 to Dec 2020. The study outcomes will be disseminated according to the CONSORT statement through a journal publication, approximately 6 months after finishing data collection.

---

<sup>1</sup> Corresponding Author: Dr. Hang DING, The Australian e-Health Research Centre, CSIRO, Level 5 - UQ Health Sciences Building 901/16, Royal Brisbane and Women's Hospital, Herston 4029, Brisbane, Australia. Email: hang.ding@csiro.au

1  
2  
3 **Trial registration:** Registered with Australian New Zealand Clinical Trial Registry (Trial ID:  
4 ACTRN12618001091291).  
5  
6  
7

8 **Key words:** Chronic pulmonary obstructive disease, randomized controlled trial, self-management, mobile  
9 health  
10

### 11 **Strengths and limitations of the study**

- 14 • Integration of an innovative mHealth system with a clinical COPD care service can  
15 potentially improve the self-management of COPD by patients.  
16
- 17 • The mHealth system being tested delivers core recommendations for the self-management of  
18 COPD as advocated by the evidence-based guidelines.  
19
- 20 • Specific health outcomes of relevance to the self-management will be measured in this  
21 mHealth-study.  
22
- 23 • The study is limited to a 6-month intervention period, and as a purely self-management  
24 program, the mobile phone application does not include remote, real-time monitoring of  
25 patient outcomes by clinicians.  
26  
27  
28  
29

### 31 **Protocol version**

32 Issue date: 12 July 2018

33 Protocol amendment number: 0

34 Authors: The research team of the MH-COPD study  
35  
36  
37  
38  
39  
40  
41  
42  
43  
44  
45  
46  
47  
48  
49  
50  
51  
52  
53  
54  
55  
56  
57  
58  
59  
60

## Introduction

Chronic obstructive pulmonary disease (COPD) is a progressive chronic lung disease, ranked as the fourth leading cause of death globally and affecting over 200 million people<sup>1</sup>. Patients with COPD have persistent respiratory symptoms and chronic airflow limitation, and often experience episodic exacerbations of COPD. Consequently, they have high risks of hospital readmission, with reported 30-day readmission rates ranging from 10% to 20%<sup>2,3</sup>.

The self-management of COPD through clinical and social support, such as optimal use of medicines, lifestyle modification and avoidance of risk factors, is essential to improve health outcomes and prevent COPD progression<sup>4,5</sup>. Accordingly, evidence-based self-management principles are recommended in clinical guidelines for COPD. Unfortunately patient adherence with self-management is often suboptimal<sup>6</sup>. For example, studies have demonstrated that only 40% - 60% of patients with COPD adhere with their inhaled medicines to control COPD symptoms<sup>7-9</sup>, and about 50% do not undertake physical activities regularly as recommended by the guidelines<sup>10</sup>. Similarly, over 24% of patients with COPD remain current cigarette smokers in Australia<sup>11</sup>, although smoking has been well-known as the most important risk factor for COPD<sup>12</sup>. Moreover, many patients often take a wait-and-see approach with self-management, and, hence, fail to seek timely interventions for exacerbations<sup>13</sup>. Barriers to the patient adherence are complex and multifaceted, likely including limited health knowledge, difficulty to access resources, insufficient clinical support, and lack of motivation<sup>13,14</sup>.

Recently, mobile health (mHealth) — defined as the use of mobile and wireless technologies for health care<sup>15</sup> - has become a new treatment approach which can empower self-management and enhance proactive clinical interventions<sup>16</sup>. For COPD, a number of mHealth applications are now available in the market<sup>17</sup>. Feasibility studies have demonstrated a high level of acceptance by patients<sup>18</sup> and many potential benefits such as knowledge gained, improved physical activities, reduced dyspnoea<sup>19</sup>, and ability to remotely assess COPD exacerbations<sup>20,21</sup>. A recent systematic review, evaluating outcomes from six randomised controlled trials (RCTs), demonstrated the potential to use smartphone applications to reduce COPD exacerbation rates, but at the same time indicated the limitations of studies to date, including inadequate sample sizes ( $\leq 100$ ) and heterogeneity in study design<sup>22</sup>. Therefore, additional high quality evidence remains essential to enable practical implementation of mHealth for the management of COPD in clinical settings.

In this study, we propose an innovative mHealth program for COPD (MH-COPD). The program has been specifically designed to integrate an mHealth system within an existing COPD care service to deliver all core components advocated by the evidence-based clinical guidelines in Australia. The MH-COPD program will make it easy for patients to access validated educational materials, and self-manage clinical symptoms. The integration with the clinical service will also enable care providers to support and motivate patients to adhere to the self-management of COPD. We hypothesize that the MH-COPD program would enhance the self-management of COPD by patients that is consistent with guideline principles, and consequently improve health outcomes. We have therefore designed an RCT to evaluate the efficacy of the MH-COPD program.

## Methods

### *Patient and Public Involvement*



1  
2  
3 The research question on improving the self-management of COPD, and outcome measures were developed  
4 according to the clinical practice in Queensland, and suggestions from Lung Foundation Australia, a not-for-profit  
5 organisation representing consumers with respiratory conditions. In design of the mobile health system, we  
6 employed an existing framework developed by The Australian e-Health Research Centre (Brisbane, Australia).  
7 This framework has been successfully used in a number of studies to assist patients in managing health conditions  
8 <sup>23,24</sup> and chronic diseases, including COPD <sup>20,21</sup>, diabetes <sup>25</sup>, and cardiovascular disease <sup>26,27</sup>. In this project, we  
9 also engaged with clinical nurses, general practitioners, thoracic physicians, and a group of patients with COPD.  
10 With this engagement, we identified the care needs for the self-management of COPD. We accordingly designed  
11 the interventional components and care processes. Finally we worked with the clinician and patient groups to  
12 design the user interface for the mobile app and clinician portal.  
13  
14  
15  
16  
17

18 Patients with stable COPD will be recruited to examine the efficacy of the MH-COPD program. The study  
19 outcomes will be disseminated through a journal publication, approximately 6 months after finishing data  
20 collection. For the participants to be informed of the outcomes, we will send the final publication to them by  
21 email.  
22  
23

### 24 ***Trial Design and Clinical Setting***

25  
26 The clinical trial will be a prospective, open, parallel group, two-arm RCT. We will recruit 100 patients with  
27 COPD from The Prince Charles Hospital (TPCH), Brisbane, Australia. The recruitment and follow-up of the trial  
28 will be from Jan 2019 to Dec 2020. The study flow chart is shown in Figure 1. Written informed consent will be  
29 obtained. Using allocation concealment, participants will be randomised to receive either the MH-COPD program  
30 (n=50 patients) or usual care (UC-COPD) (n=50 patients) for a study duration of 6 months. All participants will  
31 be assessed at baseline, 3 months, and 6 months.  
32  
33  
34

35 Patients with COPD attending the thoracic outpatient clinics at the hospital will be screened for eligibility. Each  
36 potential candidate will be provided with a participant information sheet about the research study and a consent  
37 form. If a candidate is willing to participate in the trial, written informed consent will be obtained. Each participant  
38 will be interviewed face-to-face by the clinical research staff (nurses or physicians) in the trial as a baseline  
39 assessment.  
40  
41  
42  
43  
44

### 45 ***Eligibility Criteria***

46 Adult patients with COPD will be invited to participate in this trial. The inclusion criteria will be: 1) diagnosis of  
47 COPD, defined according to the international GOLD guidelines <sup>28</sup>, 2) chronic airflow limitation that is not fully  
48 reversible (post-bronchodilator FEV<sub>1</sub>/FVC <70% and FEV<sub>1</sub> <80% predicted) and 3) current or former smokers,  
49 with a smoking history of >10 pack-years.  
50  
51  
52

53 The exclusion criteria will be: a) women who are pregnant, b) with age less than 18 years, c) with an intellectual  
54 or mental impairment, d) other comorbid lung diseases that would potentially interfere with study outcomes  
55 (predominant asthma based on physician diagnosis, active lung cancer, interstitial lung disease, severe  
56 bronchiectasis); and e) limitations to the use of mobile technology (non-correctable vision, hearing, cognitive or  
57 dexterity impairment).  
58  
59  
60

### **Randomisation**

A series of random assignment forms with permuted blocks will be generated according to a published method<sup>29</sup>. The block size will be confidential. The randomisation will be stratified by participant's sex (male and female) to ensure a balanced allocation. Assignment forms will be printed and sealed in opaque envelopes according to a predefined order. The envelopes will be stored in a secured cabinet. Following the order, the clinical research staff will open the next available envelope for each eligible participant, to reveal the assignment for the participant.

<Figure 1>

### **Baseline Assessment**

Clinical characterisation will be undertaken at baseline:

1. **Demographics and respiratory history** will be obtained, including smoking history, respiratory symptoms, chronic bronchitis, respiratory medications, oxygen use, frequency of exacerbations of COPD requiring antibiotics and/or steroids in the past 12 months.
2. **COPD symptoms and quality of life:** The COPD Assessment Test (CAT), St George's Respiratory Questionnaire (SGRQ) and modified MRC (mMRC) dyspnoea scale will be administered.
3. **Lung function:** The most recent results for pre and post-bronchodilator spirometry, and gas transfer as physiological indicator of emphysema, will be recorded. These assessments will be performed, if they are unavailable within the previous 12 months.
4. **COPD knowledge** will be assessed with a questionnaire<sup>30</sup>, based on the content of Lung Foundation Australia resources.
5. **Questionnaire on mobile technology:** Participants will be surveyed on their attitudes and beliefs about using mobile technologies (e.g. smart phones), and will be asked about their current use of mobile phone.

### **MH-COPD Intervention Group**

The MH-COPD program will implement an mHealth system as an intervention, in addition to usual care. The mHealth system will comprise an Android smartphone application (app) and a secure online clinician portal. Participants will be informed that the MH-COPD program is not a replacement for their usual clinical care, but is an add-on, and they should contact their general practitioner, respiratory nurse or respiratory specialist as usual if they have any concerns about their COPD. The care model of the MH-COPD program is shown in Figure 2.

**Resources Provided:** In the intervention group, an Android smartphone with a prepaid SIM card will be provided to each participant, with the COPD app fully installed. If a participant wishes to use his/her personal smartphone, the research staff will ensure the participant's phone is compatible with the app and then will install the app. Participants using their own personal smartphone will be provided a mobile data voucher to cover the cost of Internet data transmission. A paper-based instruction manual of the MH-COPD program will be provided to help the participant to use the app and receive interventions.

**Study Procedures and Interventions:** Each participant will be provided with an education and training session, of up to one-hour duration, to provide instructions and demonstrate how to use the app. During the session, the research staff will introduce the MH-COPD program, and will then register the participant through the online

1  
2  
3 clinician portal. After the registration, an SMS message, containing the log-in formation and a website for  
4 downloading the app, will be automatically sent to the participant's mobile phone. The research staff will then  
5 guide the participant to receive the message, download the app, and log into the app. After the registration, the  
6 research staff will help the participant create self-management tools, according to the COPD app functions  
7 described below:  
8  
9

- 10  
11 A. Health education: Ten video clips will be automatically provided to the participants via the app at scheduled  
12 times (Figure 3A), at a rate of two videos per week for the first 5 weeks. The video clips have been prepared  
13 and validated by Lung Foundation Australia <sup>31</sup>. Through the video clips, participants will gain essential  
14 knowledge on ten topics: 1) Managing your lung disease, 2) How do your lungs work? 3) Managing your  
15 breathlessness, 4) Managing treatment options, 5) Questions you can ask your health professional, 6) Who is  
16 your healthcare team? 7) Managing your fatigue and energy conservation, 8) Tips for looking after yourself  
17 and your condition, 9) Benefits of exercise programs and ongoing support, and 10) Supportive care and end-  
18 of-life issues. The duration of each video clip ranges from 6 to 12 minutes. The video clips are integrated in  
19 the app, and after each video, a questionnaire will be given to help participants self-assess the knowledge  
20 obtained. Links to the webpages of Lung Foundation Australia, Asthma Australia and the Australian  
21 Government Quitline for smoking cessation will be included in the app, to enable direct access from the  
22 smartphone to these sites.  
23  
24 B. Symptom monitoring: Participants will use the app each day to self-manage COPD symptoms, including  
25 breathlessness, cough, sputum colour, sputum volume, and wheezing (Figure 3B). The severity levels of the  
26 symptoms will be predefined, and scored on the app. The recorded symptoms of individual participants will  
27 be automatically compared with those in the previous day. If two or more symptoms of a participant are  
28 detected with increased scores, the participant will be notified via an automated smartphone notification to  
29 use an electronic COPD action plan in the app.  
30  
31 C. Electronic COPD action plan: Participants will work through an electronic COPD action plan in the app on a  
32 daily basis. The action plan will contain 3 sections based on symptom severity: danger signs (Figure 3C),  
33 signs of a flare-up, and staying well. It will contain recommendations for medicines prescribed for worsening  
34 symptoms and exacerbations. The medicines will include bronchodilators, antibiotics and oral steroids, and  
35 will be entered into the action plan in the app by the research staff during the education and training session.  
36 The sections and corresponding recommendations in the app will replicate a paper-based COPD action plan  
37 clinically validated and used in Queensland Health. This will make it easy for patients to access and use the action plan.  
38 Participants in the intervention program will still be required to engage with care providers to diagnose and treat clinical  
39 conditions, including acute exacerbations of COPD, as what they do in usual care.  
40  
41 D. Physical activity: The app will use inbuilt motion sensors in the smartphone to automatically record walking  
42 steps. Participants will be asked to carry the smartphone with the app during normal activity in waking hours  
43 in order to capture walking activity. An initial personal goal for steps to walk will be prescribed <sup>32</sup> for each  
44 participant, and this goal will be automatically increased in the first 4 weeks. Motivational messages will also  
45 be automatically sent to the participant according to the number of steps and goal achievement each day.  
46  
47 E. Smoking cessation: For current smokers, the participants will use the app to record the number of cigarettes  
48 consumed each day, triggers and cues for smoking cigarettes, attempts to reduce cigarettes, and use of  
49  
50  
51  
52  
53  
54  
55  
56  
57  
58  
59  
60

1  
2  
3 pharmacotherapy (such as nicotine replacement or varenicline). A goal of the maximum number of cigarettes  
4 consumed each day will be provided to each participant. The goal of cigarettes smoked will be automatically  
5 reduced down to zero through the first six-week time period. Clinicians in the program will discuss with  
6 individual participants to set the goal, and adjust the goal during follow-up. Motivational messages will be  
7 automatically generated and sent according to the number of cigarettes recorded daily and the goal  
8 achievement through the 6-week period.  
9  
10  
11

- 12 F. Inhaler technique: The participants will use the app to review videos to learn to how to use inhalers correctly.  
13 The videos have been prepared and validated by Lung Foundation Australia<sup>33</sup> and will be preloaded in the  
14 app, according to inhalers prescribed to individual participants. Videos of each participant actually using their  
15 inhalers will also be recorded by the research staff during the education and training session, and stored in  
16 the app for the participant to review.  
17  
18  
19

20 **Monitoring of Patient Adherence:** All the data entries of the participants recorded via the app, such as symptoms,  
21 the action plan, and cigarettes, will be automatically uploaded to the online portal and analysed to assess the  
22 patient adherence. If a participant does not adhere to program for two days, alerts will be generated in the portal,  
23 and automated motivational messages will be sent to the participant via app notifications. The research staff will  
24 review the alerts in the portal and accordingly contact the participant to troubleshoot the nonadherence.  
25  
26

27 **Diary Card for Exacerbations:** Participants will keep a hard copy diary to record exacerbations and hospital  
28 admissions during the study. A COPD exacerbation will be defined as an increase in respiratory symptoms  
29 requiring treatment with systemic steroids and/or antibiotics<sup>34</sup>. Participants will record the start and end date of  
30 treatment for the exacerbation. The research staff based at The Prince Charles Hospital will phone each participant  
31 at 2 weeks, 2 months and 4 months, to ensure adherence to the exacerbation diary and reporting of exacerbations,  
32 as well as adherence to the app. The data in the diary will be collected and analysed to assess the frequency,  
33 duration and severity of exacerbations in the participants.  
34  
35  
36  
37

38 <Figure 2>

39 <Figure 3>  
40  
41

#### 42 **Usual Care Group**

43  
44 **Usual care:** Participants in the usual care (UC-COPD) group will receive standard care from respiratory clinics  
45 and primary care, throughout the trial period.  
46

47 **Resources provided:** No COPD app will be provided to the usual care group. A standard care package will be  
48 provided to help participants with usual care, including general written advice about health education, the COPD  
49 action plan, symptom monitoring, physical activity, smoking cessation and inhaler technique. In the package, the  
50 information on the self-management of COPD from the Lung Foundation Australia and the corresponding web  
51 address will be provided.  
52  
53  
54

55 **Study procedures:** After randomization and baseline assessment, the research staff will train the participant on  
56 study procedures and take them through the instruction manual. These training and procedures will be the same  
57 as those provided in usual care in Queensland Health.  
58  
59  
60

**Diary card for exacerbations:** Participants will keep a written, hard copy diary to record exacerbations and hospital admissions during the study, similar to the methods described in the Intervention group.

### Outcomes

The outcome measures of the study are shown in Table 1. The primary outcome measures will be COPD symptoms and quality of life, assessed by the CAT<sup>35</sup>, St George's Respiratory Questionnaire (SGRQ)<sup>36</sup> and mMRC<sup>37</sup> questionnaires at the baseline and 6-month time point. The CAT and SGRQ questionnaires will be used because they are responsive to interventions<sup>38</sup>. We will also include mMRC because it is essential for assessing dyspnoea, and has been adopted in GOLD<sup>28</sup> and Australian COPD-X guidelines<sup>4</sup>. The secondary outcomes will include the inhaled medicine adherence (Test of the Adherence to Inhalers, TAI)<sup>39</sup>, smoking cessation, and physical activity by Global Physical Activity Questionnaire (GPAQ)<sup>40</sup>. Smoking cessation will be defined as zero cigarettes smoked in the last 7 days of the 6 month follow-up period after commencement of the intervention, as assessed through the self-reported diary. To assess the risk of COPD exacerbation, we will analyse the rate of COPD exacerbations recorded in the diary and MH-COPD system. Additionally, we will assess the health care utilizations relevant to hospital readmissions and visits of the emergency department. These events will be obtained from the hospital information systems in the trial.

For the participants in the MH-COPD group, we will report the adherence quantified by the daily data entries recommended, and user experience assessed by a questionnaire previously applied in a previous mobile health based study<sup>25</sup>.

**Table 1.** Study outcome measures and assessment tools and data resources.

| Primary Outcome                   | Baseline | Six months | Methods/Instruments                                                                                      |
|-----------------------------------|----------|------------|----------------------------------------------------------------------------------------------------------|
| COPD symptoms and quality of life | Y        | Y          | CAT, SGRQ and mMRC                                                                                       |
| <b>Secondary Outcomes</b>         |          |            |                                                                                                          |
| COPD knowledge                    | Y        | Y          | Lung Foundation Australia questionnaire on COPD knowledge                                                |
| Inhaled medicine adherence        | Y        | Y          | TAI questionnaire                                                                                        |
| Use of COPD action plan           | N        | Y          | Self-reported in diary                                                                                   |
| Smoking cessation                 | Y        | Y          | Self-reported in diary                                                                                   |
| Physical activity                 | Y        | Y          | GPAQ (both groups), step count (intervention group)                                                      |
| Exacerbation rate                 | N        | Y          | Exacerbations recorded on hard copy exacerbation diary (both groups) and on the app (intervention group) |
| Health care utilisation           | N        | Y          | Hospital readmissions and visits to the emergency department via hospital information systems            |
| User experience of the mobile app | N        | Y          | Questionnaire (intervention group).                                                                      |

### ***Sample Size***

The sample size has been calculated based on the co-primary outcomes of the CAT score and SGRQ score. 100 patients, randomised 1:1 to intervention (MH-COPD) or usual care (UC-COPD), will have 80% power at significance level (alpha) of 0.05 to detect a clinically important reduction of 3 in the CAT score<sup>38</sup> (primary outcome) in ~50% of intervention patients, compared to 20% in the control group, even with 40 patients in each final group (allowing for up to 20% withdrawal). In addition, this sample size will have 80% power at significance level (alpha) of 0.05 to detect a relative risk of 2 for a clinically important increase in SGRQ of 4 (co-primary outcome) in the intervention group, given a proportion of 30% of the control group achieving this with usual care, even with 40 patients in each final group (allowing for up to 20% withdrawal).

### ***Blinding***

This is an open randomized controlled trial, due to the difficulty in effectively blinding participants and clinical researchers to the treatment groups. Data analysis of outcomes based on questionnaires and diary cards (common to both groups) will be analysed by a researcher not directly involved with recruitment and follow-up. In the analysis, only de-identified data will be provided.

### ***Data Collection and Storage***

The research staff will interview each participant at baseline to collect the data patient characteristics and conduct the assessments for those questionnaire-based outcomes. During the interview, the participant will receive paper-based assessment forms (questionnaires), and will be given sufficient time for completion of these. The completeness of each questionnaire will be checked at the end of the interview by the research staff for quality purposes.

All study files, including the questionnaire forms, master list of participants, and case report forms, will be stored securely, either in password-protected computer files (for electronic files) or in locked filing cabinets (for hard copies) in a secure area. Access to these files will only be granted to the study personnel trained in confidentiality and privacy procedures. All trial data provided for research analysis will be de-identified, including patient characteristics, primary and secondary outcomes, and data entries through the online portal systems used in the study.

All the trial files and data will be stored securely for a minimum of 5 years after completion of the study and, finally, be securely destroyed according to the Australian National Health and Medical Research Council code for responsible conduct of research guidelines<sup>41</sup>.

### ***Strategies for Participant Retention***

Prior to the trial recruitment, the research team will discuss the importance of participant retention within the recruitment and care teams. During the trial, each participant will be provided with a telephone contact in the information package. Accordingly, the participants can contact the research staff for trial-related support. A structured procedure and log files will be in place to guide the research staff to document the participants' enquiries, and ensure timely responses and/or follow-ups. Additionally, we will reimburse the participants for trial-related expenses including Android smartphone handsets if needed, mobile Internet costs, and parking fees for interviews and assessments.

### ***Statistical Methods***

All participants randomized into this study will be included in the final comparative analysis on an intention-to-treat basis. A  $\chi^2$  test will be used to compare categorical variables between the MH-COPD and UC-COPD group. ANOVA will be applied to compare continuous variables between the groups. We will also analyse fluctuations of monitored symptoms to predict COPD exacerbations for early intervention. In this predictive analysis, we will use a nonlinear regression method, such as the exponential regression model previously applied<sup>20</sup>, to analyse the relationship between the changes in symptoms and occurrence of exacerbations. In these comparison and analysis methods, a p-value less than 0.05 (two-tailed) will be considered statistically significant. The analysis will be adjusted for confounding variables including age and sex. We will mainly use SPSS version 23 for the statistical analysis. Missing data at the case level will be imputed using a multiple imputation method implemented in SPSS.

### ***Trial Management***

A trial steering committee will convene monthly (with additional meetings if needed) and take overall responsibility for the conduct of the trial. The committee will comprise representatives of the chief investigators, research staff and project managers from the collaborating organizations. The responsibilities of the committee include managing the trial progress, reviewing adverse events, resolving technical issues, monitoring trial data, providing reports to the project sponsors and ethics committees, and deciding budget and administration issues. If necessary, the committee will advise and make changes to the clinical trial protocol. The committee will be independent from project sponsors and free from competing interests.

### ***Trial Monitoring***

A data monitoring committee (DMC), comprising four clinical researchers not directly involved in the study, will evaluate safety throughout the trial. The DMC will be independent from the trial sponsors and competing interests. The DMC will convene every 3 months (with additional meetings if needed) to review the risks and severity of adverse events or incidents reported. The statistical analysis methods and outcomes will be reviewed by a statistician. The DMC will assess the severity of adverse events and/or incidents, and provide recommendations if needed. If there are substantial differences in rates of serious adverse events (including mortality) or hospitalisation between the MH-COPD and UC-COPD groups, the DMC will investigate the potential reasons for the differences. If significant adverse events are caused by the MH-COPD program, the DMC will recommend to terminate the trial early.

### ***Limitations***

A number of potential limitations should be considered. This study is limited to a 6-month intervention duration, which may be insufficient to reflect long-term effects of the intervention. The study is also not blinded to participants and clinicians, although analysis of 6 month outcomes will be blinded. This is a hospital-based study, which limits generalisability; however, future studies will address initiating of mHealth for patients with COPD in primary care.

### **Discussion**

1  
2  
3 Currently many mobile apps for COPD are available in the market, but they often have limited features or focuses  
4 17. Importantly, the clinical evidence on the efficacy and effectiveness is generally absent 17,22,42. Recently, several  
5 RCT studies evaluated potential benefits to use mHealth for COPD, but they are normally limited by small sample  
6 sizes ( $n \leq 100$ ) and narrow scopes, such as intervention of worsening COPD symptoms 43-45, physical activities  
7 19,46,47 or impacts of environment/climate change 48. Moreover, many mHealth studies for COPD have been found  
8 with many issues, such as high drop-out rates (20% 45, 33% 47 and 36% 19), large variations of patient adherence  
9 (20% 47 to 98% 44 adherence rates), and inconsistent user experience (mixed with technical challenges 19 and good  
10 satisfactions 47). Therefore, further clinical validation remains essential to use the mHealth for improving COPD  
11 care.  
12

13  
14  
15  
16 The MH-COPD program has been deliberately designed to overcome those barriers stated before, and to focus on  
17 improving patient adherence to the self-management, consistent with the evidence-based clinical guidelines 4. In  
18 the program, patients will use a mobile app to conveniently access educational videos to gain essential knowledge  
19 and skills as recommended by the guidelines. The app will also assist the patients in monitoring COPD symptoms  
20 and risk factors (low physical activity and smoking of cigarettes). Patients will interact with the electronic COPD  
21 action plan to make decision for significant changes in the symptoms; and receive automated motivational  
22 messages for modification of the risk factors. The patients' data, including monitoring symptoms, risk factors and  
23 adherence, will be automatically uploaded to the portal. Using the portal, the care providers are able to remotely  
24 monitor the patient conditions and adherence, and accordingly provide timely interventions. Compared with the  
25 paper based approach in usual care, the use of mHealth would make it easier and simpler for the patients to access  
26 clinical resources and self-manage COPD. Additionally, it would allow the care providers to actively engage with  
27 the patients in COPD care. Therefore, we expect the MH-COPD program to improve the patient compliance and  
28 health outcomes.  
29

30  
31  
32  
33  
34  
35 Different from many existing studies, our MH-COPD program was designed to include all core components  
36 outlined by the evidence-based guidelines in Australia, and integrate within COPD clinics. Additionally, the  
37 program aims at improving patient self-management. Although the nurses and COPD physicians in the program  
38 will review the patients' data through the clinician portal, their interventions mainly focus on supporting and  
39 motivating patients to adhere to the program. Additionally, many automated messages and alerts will provided  
40 through the mHealth system to support the intervention. Therefore, the burden to the clinicians in the program  
41 would be minimum. In all, the MH-COPD study will provide a unique opportunity to help understand the potential  
42 to use mobile health innovations to improve patient self-management and health outcomes, and hence add  
43 evidence for the effectiveness of using mobile health to improve COPD care in the community.  
44  
45  
46  
47  
48

### 49 **Summary**

50  
51 The study will specifically integrate an innovative mHealth system with a clinical COPD service and evaluate this  
52 approach through a RCT. The evaluation will provide a unique opportunity to improve COPD care in the  
53 community through mobile health innovations.  
54  
55  
56  
57  
58

### 59 **Figure Legends:**



1  
2  
3 Figure 1. Study flow chart of the randomized controlled trial designed to evaluate the MH-COPD program.

4 UC=usual care, MH=mobile health.  
5  
6

7 Figure 2. The care model of the MH-COPD program includes the components of health education, electronic  
8 COPD action plan, symptom monitoring, physical activity, smoking cessation, and inhaler technique.  
9

10  
11 Figure 3. Selected screenshots showing the user interface of the mobile application. A: Scheduled educational  
12 videos preloaded in the app. B: User interface to record symptoms and risk factors. C: User interface showing an  
13 assessment of symptoms in the COPD action plan.  
14  
15  
16  
17  
18  
19

### 20 **Author contributions**

21 The MH-COPD program was designed by I.Y, H.D, D.I, L.M, R.H, K.P and P.M. This study protocol was  
22 developed by I.Y and H.D. The first draft of the manuscript was written by I.Y and H.D. All authors (H.D, M.K,  
23 D.I, L.M, R.H, K.P, R.P, E.S, R.B, K.F, P.M and I.Y) contributed to the design of the clinical study and critical  
24 revision of the manuscript.  
25  
26  
27  
28  
29  
30  
31  
32  
33  
34  
35  
36  
37  
38  
39  
40  
41  
42  
43  
44  
45  
46  
47  
48  
49  
50  
51  
52  
53  
54  
55  
56  
57  
58  
59  
60

## Funding

This project is funded by The Prince Charles Hospital Foundation, Brisbane, Australia (Experienced Researcher grant no. ER2015-21).

## Conflicts of interest

There are no conflicts of interest in this project.

## Acknowledgement

The authors gratefully acknowledge the patients and staff of The Prince Charles Hospital for their involvement in this study, and contributors to the video clips prepared by Lung Foundation Australia.

## References

1. Ferkol T, Schraufnagel D. The global burden of respiratory disease. *Annals of the American Thoracic Society* 2014; **11**(3): 404-6.
2. Harries TH, Thornton H, Crichton S, Schofield P, Gilkes A, White PT. Hospital readmissions for COPD: a retrospective longitudinal study. *NPJ primary care respiratory medicine* 2017; **27**(1): 31.
3. Shah T, Churpek MM, Coca Perrailon M, Konetzka RT. Understanding why patients with COPD get readmitted: a large national study to delineate the Medicare population for the readmissions penalty expansion. *Chest* 2015; **147**(5): 1219-26.
4. Yang IA, Brown JL, George J, et al. COPD-X Australian and New Zealand guidelines for the diagnosis and management of chronic obstructive pulmonary disease: 2017 update. *The Medical journal of Australia* 2017; **207**(10): 436-42.
5. World Health Organization. COPD management. <http://www.who.int/respiratory/copd/management/en/> (accessed 11 November 2017).
6. Martin LR, Williams SL, Haskard KB, DiMatteo MR. The challenge of patient adherence. *Therapeutics and Clinical Risk Management* 2005; **1**(3): 189-99.
7. Cecere LM, Slatore CG, Uman JE, et al. Adherence to long-acting inhaled therapies among patients with chronic obstructive pulmonary disease (COPD). *Copd* 2012; **9**(3): 251-8.
8. Restrepo RD, Alvarez MT, Wittnebel LD, et al. Medication adherence issues in patients treated for COPD. *Int J Chron Obstruct Pulmon Dis* 2008; **3**(3): 371-84.
9. Ingebrigtsen TS, Marott JL, Nordestgaard BG, et al. Low Use and Adherence to Maintenance Medication in Chronic Obstructive Pulmonary Disease in the General Population. *Journal of General Internal Medicine* 2015; **30**(1): 51-9.
10. Davis AH. Exercise adherence in patients with chronic obstructive pulmonary disease: an exploration of motivation and goals. *Rehabil Nurs* 2007; **32**(3): 104-10.
11. Welfare AIOH. COPD, associated comorbidities and risk factors. 2016. <https://www.aihw.gov.au/reports/asthma-other-chronic-respiratory-conditions/copd-associated-comorbidities-and-risk-factors/contents/risk-factors-associated-with-copd> (accessed 27/11/2017 by HD 2017).
12. Tashkin DP, Murray RP. Smoking cessation in chronic obstructive pulmonary disease. *Respir Med* 2009; **103**(7): 963-74.
13. Horie J, Murata S, Hayashi S, et al. Factors that delay COPD detection in the general elderly population. *Respir Care* 2011; **56**(8): 1143-50.
14. Sanduzzi A, Balbo P, Candoli P, et al. COPD: adherence to therapy. *Multidisciplinary Respiratory Medicine* 2014; **9**(1): 60.
15. Agarwal S, LeFevre AE, Lee J, et al. Guidelines for reporting of health interventions using mobile phones: mobile health (mHealth) evidence reporting and assessment (mERA) checklist. *Bmj* 2016; **352**: i1174.
16. World Health Organisation. mHealth New horizons for health through mobile technologies. 2011. [http://www.who.int/goe/publications/goe\\_mhealth\\_web.pdf](http://www.who.int/goe/publications/goe_mhealth_web.pdf) (accessed 1 July 2017).

17. Sobnath DD, Philip N, Kayyali R, et al. Features of a Mobile Support App for Patients With Chronic Obstructive Pulmonary Disease: Literature Review and Current Applications. *JMIR mHealth and uHealth* 2017; **5**(2): e17.
18. Joe J, Demiris G. Older adults and mobile phones for health: a review. *J Biomed Inform* 2013; **46**(5): 947-54.
19. Nguyen HQ, Donesky-Cuenco D, Wolpin S, et al. Randomized controlled trial of an internet-based versus face-to-face dyspnea self-management program for patients with chronic obstructive pulmonary disease: pilot study. *J Med Internet Res* 2008; **10**(2): e9.
20. Ding H, Karunanithi M, Kanagasingam Y, Vignarajan J, Moodley Y. A pilot study of a mobile-phone-based home monitoring system to assist in remote interventions in cases of acute exacerbation of COPD. *J Telemed Telecare* 2014; **20**(3): 128-34.
21. Ding H, Moodley Y, Kanagasingam Y, Karunanithi M. A mobile-health system to manage chronic obstructive pulmonary disease patients at home. *Conference proceedings : Annual International Conference of the IEEE Engineering in Medicine and Biology Society IEEE Engineering in Medicine and Biology Society Annual Conference* 2012; **2012**: 2178-81.
22. Alwashmi M, Hawboldt J, Davis E, Marra C, Gamble JM, Abu Ashour W. The Effect of Smartphone Interventions on Patients With Chronic Obstructive Pulmonary Disease Exacerbations: A Systematic Review and Meta-Analysis. *JMIR mHealth and uHealth* 2016; **4**(3): e105.
23. Duncan M, Vandelanotte C, Kolt GS, et al. Effectiveness of a Web- and Mobile Phone-Based Intervention to Promote Physical Activity and Healthy Eating in Middle-Aged Males: Randomized Controlled Trial of the ManUp Study. *Journal of Medical Internet Research* 2014; **16**(6): e136.
24. Ding H, Karunanithi M, Duncan M, Ireland D, Noakes M, Hooker C. A mobile phone enabled health promotion program for middle-aged males. *Conference proceedings : Annual International Conference of the IEEE Engineering in Medicine and Biology Society IEEE Engineering in Medicine and Biology Society Annual Conference* 2013; **2013**: 1173-6.
25. Ding H, Fatehi F, Russell AW, et al. User Experience of an Innovative Mobile Health Program to Assist in Insulin Dose Adjustment: Outcomes of a Proof-of-Concept Trial. *TELEMEDICINE and e-HEALTH* 2018; **24**(7).
26. Walters DL, Sarela A, Fairfull A, et al. A mobile phone-based care model for outpatient cardiac rehabilitation: the care assessment platform (CAP). *BMC Cardiovasc Disord* 2010; **10**: 5.
27. Varnfield M, Karunanithi M, Lee C-K, et al. Smartphone-based home care model improved use of cardiac rehabilitation in postmyocardial infarction patients: results from a randomised controlled trial. *Heart* 2014.
28. Global Initiative for Chronic Obstructive Lung Disease I. GLOBAL INITIATIVE FOR CHRONIC OBSTRUCTIVE LUNG DISEASE POCKET GUIDE TO COPD DIAGNOSIS, MANAGEMENT, AND PREVENTION: A Guide for Health Care Professionals 2017 EDITION. 2017. <http://goldcopd.org/wp-content/uploads/2016/12/wms-GOLD-2017-Pocket-Guide.pdf> (accessed 11 November 2017).
29. Doig GS, Simpson F. Randomization and allocation concealment: a practical guide for researchers. *J Crit Care* 2005; **20**(2): 187-91; discussion 91-3.
30. Lung Foundation Australia. C.O.P.E. Pre-Program Knowledge Questionnaire 2018. <http://cope.lungfoundation.com.au/course/viewCourse/cid,26.html> (accessed 9 February 2018).
31. Lung Foundation Australia. Living with a lung condition. <https://lungfoundation.com.au/patient-support/living-with-a-lung-condition/self-management/> (accessed 11 November 2017).
32. Nolan CM, Maddocks M, Canavan JL, et al. Pedometer Step Count Targets during Pulmonary Rehabilitation in Chronic Obstructive Pulmonary Disease. A Randomized Controlled Trial. *Am J Respir Crit Care Med* 2017; **195**(10): 1344-52.
33. Lung Foundation Australia. Inhaler device technique. <https://lungfoundation.com.au/patient-support/copd/inhaler-technique-fact-sheets/> (accessed 11 November 2017).
34. Global Initiative for Chronic Obstructive Lung Disease Inc. GLOBAL STRATEGY FOR THE DIAGNOSIS, MANAGEMENT, AND PREVENTION OF CHRONIC OBSTRUCTIVE PULMONARY DISEASE (2018 REPORT), 2018.
35. Jones PW, Harding G, Berry P, Wiklund I, Chen WH, Kline Leidy N. Development and first validation of the COPD Assessment Test. *Eur Respir J* 2009; **34**(3): 648-54.
36. Jones PW, Quirk FH, Baveystock CM, Littlejohns P. A self-complete measure of health status for chronic airflow limitation. The St. George's Respiratory Questionnaire. *The American review of respiratory disease* 1992; **145**(6): 1321-7.
37. Bestall J, Paul E, Garrod R, Garnham R, Jones P, Wedzicha J. Usefulness of the Medical Research Council (MRC) dyspnoea scale as a measure of disability in patients with chronic obstructive pulmonary disease. *Thorax* 1999; **54**(7): 581-6.

- 1  
2  
3 38. Smid DE, Franssen FM, Houben-Wilke S, et al. Responsiveness and MCID Estimates for CAT, CCQ,  
4 and HADS in Patients With COPD Undergoing Pulmonary Rehabilitation: A Prospective Analysis. *Journal of the*  
5 *American Medical Directors Association* 2017; **18**(1): 53-8.
- 6 39. Plaza V, Fernandez-Rodriguez C, Melero C, et al. Validation of the 'Test of the Adherence to Inhalers'  
7 (TAI) for Asthma and COPD Patients. *J Aerosol Med Pulm Drug Deliv* 2016; **29**(2): 142-52.
- 8 40. World Health Organization. Global Physical Activity Questionnaire (GPAQ v2.0). 2002.  
9 [http://www.who.int/chp/steps/resources/GPAQ\\_Analysis\\_Guide.pdf](http://www.who.int/chp/steps/resources/GPAQ_Analysis_Guide.pdf) (accessed 9 February 2018).
- 10 41. National Health and Medical Research Council. Statement and Guidelines on Research Practice 1997.  
11 <https://www.nhmrc.gov.au/guidelines-publications/r24> (accessed 11 November 2017).
- 12 42. Velardo C, Shah SA, Gibson O, et al. Digital health system for personalised COPD long-term  
13 management. *BMC Med Inform Decis Mak* 2017; **17**(1): 19.
- 14 43. Halpin DM, Laing-Morton T, Spedding S, et al. A randomised controlled trial of the effect of automated  
15 interactive calling combined with a health risk forecast on frequency and severity of exacerbations of COPD  
16 assessed clinically and using EXACT PRO. *Primary care respiratory journal : journal of the General Practice*  
17 *Airways Group* 2011; **20**(3): 324-31, 2 p following 31.
- 18 44. Farmer A, Williams V, Velardo C, et al. Self-Management Support Using a Digital Health System  
19 Compared With Usual Care for Chronic Obstructive Pulmonary Disease: Randomized Controlled Trial. *J Med*  
20 *Internet Res* 2017; **19**(5): e144.
- 21 45. Pedone C, Chiurco D, Scarlata S, Incalzi RA. Efficacy of multiparametric telemonitoring on respiratory  
22 outcomes in elderly people with COPD: a randomized controlled trial. *BMC Health Serv Res* 2013; **13**: 82.
- 23 46. Liu WT, Wang CH, Lin HC, et al. Efficacy of a cell phone-based exercise programme for COPD. *Eur*  
24 *Respir J* 2008; **32**(3): 651-9.
- 25 47. Tabak M, Brusse-Keizer M, van der Valk P, Hermens H, Vollenbroek-Hutten M. A telehealth program  
26 for self-management of COPD exacerbations and promotion of an active lifestyle: a pilot randomized controlled  
27 trial. *International Journal of Chronic Obstructive Pulmonary Disease* 2014; **9**: 935-44.
- 28 48. Jehn M, Donaldson G, Kiran B, et al. Tele-monitoring reduces exacerbation of COPD in the context of  
29 climate change--a randomized controlled trial. *Environmental health : a global access science source* 2013; **12**:  
30 99.
- 31  
32  
33  
34  
35  
36  
37  
38  
39  
40  
41  
42  
43  
44  
45  
46  
47  
48  
49  
50  
51  
52  
53  
54  
55  
56  
57  
58  
59  
60

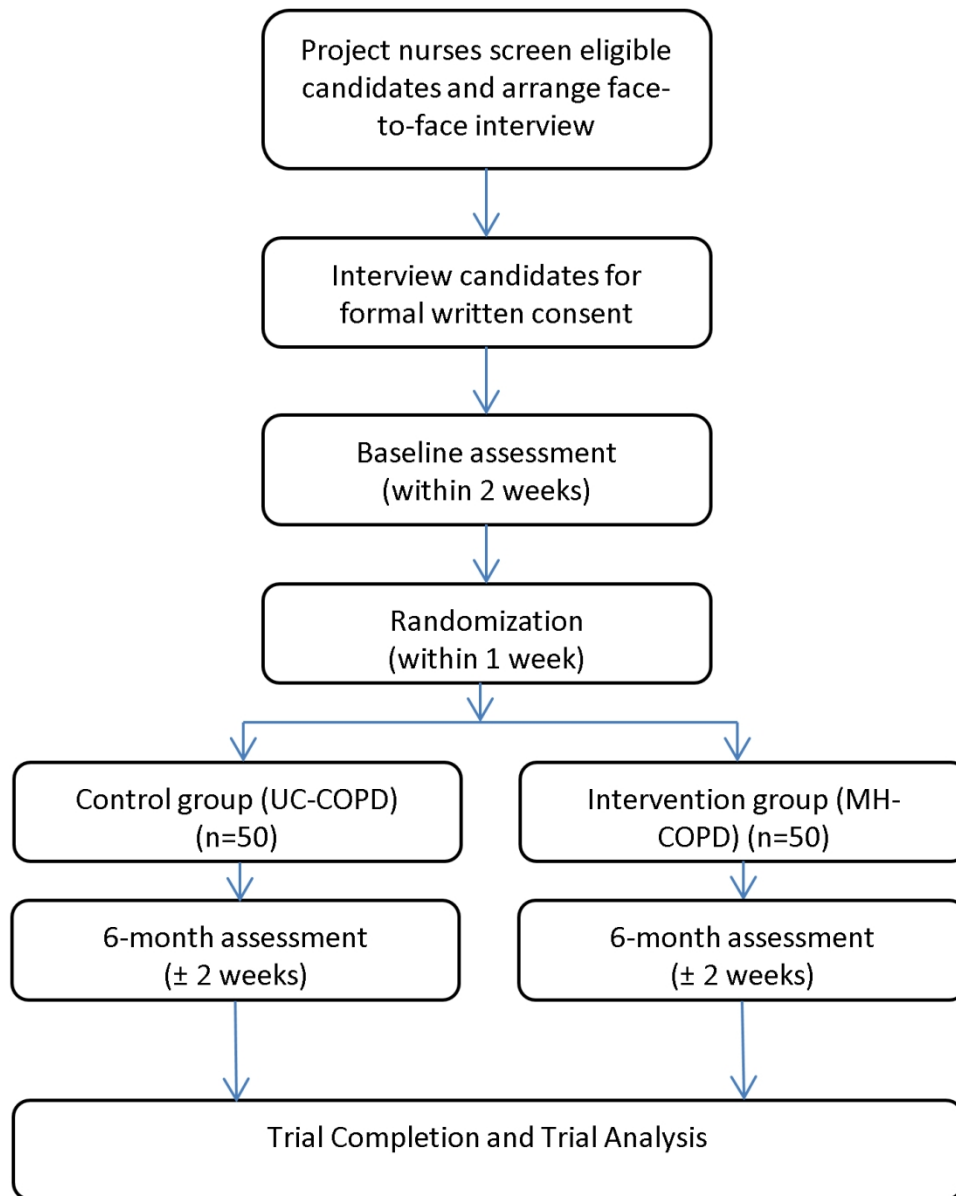

Figure 1. Study flow chart of the randomized controlled trial designed to evaluate the MH-COPD program. UC=usual care, MH=mobile health.

121x151mm (300 x 300 DPI)

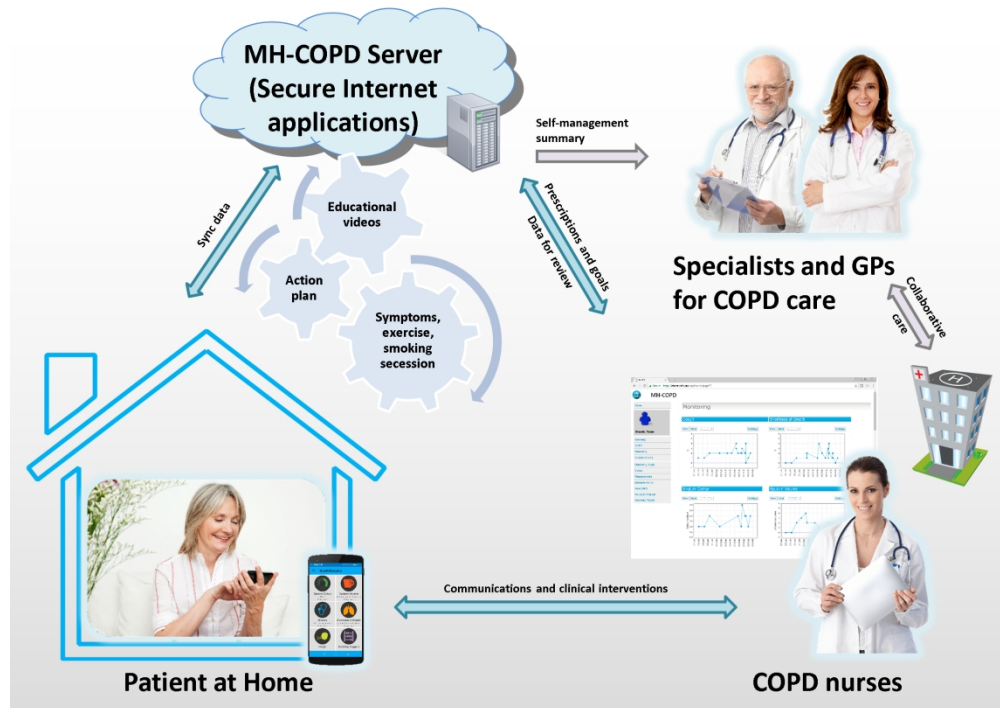

Figure 2. The care model of the MH-COPD program includes the components of health education, electronic COPD action plan, symptom monitoring, physical activity, smoking cessation, and inhaler technique.

215x154mm (300 x 300 DPI)

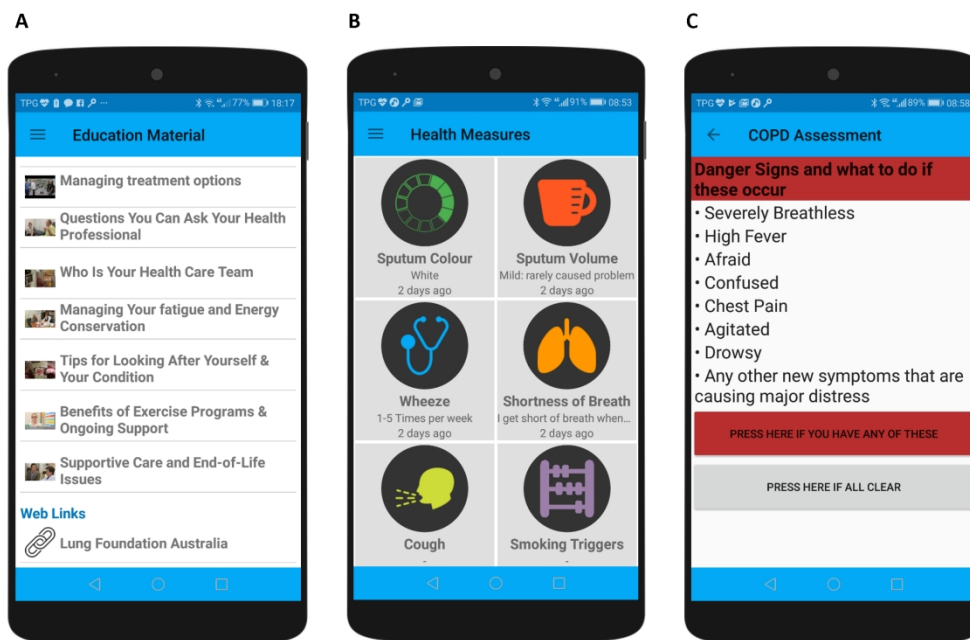

Figure 3. Selected screenshots showing the user interface of the mobile application. A: Scheduled educational videos preloaded in the app. B: User interface to record symptoms and risk factors. C: User interface showing an assessment of symptoms in the COPD action plan.

233x152mm (300 x 300 DPI)

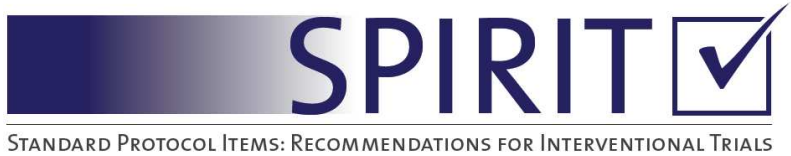

1  
2  
3  
4  
5  
6  
7  
8  
9  
10  
11  
12  
13  
14  
15  
16  
17  
18  
19  
20  
21  
22  
23  
24  
25  
26  
27  
28  
29  
30  
31  
32  
33  
34  
35  
36  
37  
38  
39  
40  
41  
42  
43  
44  
45  
46  
47

SPIRIT 2013 Checklist: Recommended items to address in a clinical trial protocol and related documents\*

| Section/item                      | Item No | Description                                                                                                                                                                                                                                                                              | Addressed on page number |
|-----------------------------------|---------|------------------------------------------------------------------------------------------------------------------------------------------------------------------------------------------------------------------------------------------------------------------------------------------|--------------------------|
| <b>Administrative information</b> |         |                                                                                                                                                                                                                                                                                          |                          |
| Title                             | 1       | Descriptive title identifying the study design, population, interventions, and, if applicable, trial acronym                                                                                                                                                                             | ___1___                  |
| Trial registration                | 2a      | Trial identifier and registry name. If not yet registered, name of intended registry                                                                                                                                                                                                     | ___1___                  |
|                                   | 2b      | All items from the World Health Organization Trial Registration Data Set                                                                                                                                                                                                                 | __1 (ANZCTR)__           |
| Protocol version                  | 3       | Date and version identifier                                                                                                                                                                                                                                                              | ___2___                  |
| Funding                           | 4       | Sources and types of financial, material, and other support                                                                                                                                                                                                                              | ___12___                 |
| Roles and responsibilities        | 5a      | Names, affiliations, and roles of protocol contributors                                                                                                                                                                                                                                  | ___1,11___               |
|                                   | 5b      | Name and contact information for the trial sponsor                                                                                                                                                                                                                                       | ___12___                 |
|                                   | 5c      | Role of study sponsor and funders, if any, in study design; collection, management, analysis, and interpretation of data; writing of the report; and the decision to submit the report for publication, including whether they will have ultimate authority over any of these activities | ___12___                 |
|                                   | 5d      | Composition, roles, and responsibilities of the coordinating centre, steering committee, endpoint adjudication committee, data management team, and other individuals or groups overseeing the trial, if applicable (see Item 21a for data monitoring committee)                         | ___9-10___               |



## Introduction

|                          |    |                                                                                                                                                                                                           |     |
|--------------------------|----|-----------------------------------------------------------------------------------------------------------------------------------------------------------------------------------------------------------|-----|
| Background and rationale | 6a | Description of research question and justification for undertaking the trial, including summary of relevant studies (published and unpublished) examining benefits and harms for each intervention        | 3   |
|                          | 6b | Explanation for choice of comparators                                                                                                                                                                     | 3   |
| Objectives               | 7  | Specific objectives or hypotheses                                                                                                                                                                         | 3   |
| Trial design             | 8  | Description of trial design including type of trial (eg, parallel group, crossover, factorial, single group), allocation ratio, and framework (eg, superiority, equivalence, noninferiority, exploratory) | 3-4 |

## Methods: Participants, interventions, and outcomes

|                      |     |                                                                                                                                                                                                                                                                                                                                                                                |     |
|----------------------|-----|--------------------------------------------------------------------------------------------------------------------------------------------------------------------------------------------------------------------------------------------------------------------------------------------------------------------------------------------------------------------------------|-----|
| Study setting        | 9   | Description of study settings (eg, community clinic, academic hospital) and list of countries where data will be collected. Reference to where list of study sites can be obtained                                                                                                                                                                                             | 4   |
| Eligibility criteria | 10  | Inclusion and exclusion criteria for participants. If applicable, eligibility criteria for study centres and individuals who will perform the interventions (eg, surgeons, psychotherapists)                                                                                                                                                                                   | 4   |
| Interventions        | 11a | Interventions for each group with sufficient detail to allow replication, including how and when they will be administered                                                                                                                                                                                                                                                     | 5-7 |
|                      | 11b | Criteria for discontinuing or modifying allocated interventions for a given trial participant (eg, drug dose change in response to harms, participant request, or improving/worsening disease)                                                                                                                                                                                 | 4-5 |
|                      | 11c | Strategies to improve adherence to intervention protocols, and any procedures for monitoring adherence (eg, drug tablet return, laboratory tests)                                                                                                                                                                                                                              | n/a |
|                      | 11d | Relevant concomitant care and interventions that are permitted or prohibited during the trial                                                                                                                                                                                                                                                                                  | n/a |
| Outcomes             | 12  | Primary, secondary, and other outcomes, including the specific measurement variable (eg, systolic blood pressure), analysis metric (eg, change from baseline, final value, time to event), method of aggregation (eg, median, proportion), and time point for each outcome. Explanation of the clinical relevance of chosen efficacy and harm outcomes is strongly recommended | 7,8 |
| Participant timeline | 13  | Time schedule of enrolment, interventions (including any run-ins and washouts), assessments, and visits for participants. A schematic diagram is highly recommended (see Figure)                                                                                                                                                                                               | 4   |

1  
2  
3 Sample size 14 Estimated number of participants needed to achieve study objectives and how it was determined, including \_\_\_\_\_ 8,9 \_\_\_\_\_  
4 clinical and statistical assumptions supporting any sample size calculations

5  
6 Recruitment 15 Strategies for achieving adequate participant enrolment to reach target sample size \_\_\_\_\_ 9 \_\_\_\_\_  
7

8 **Methods: Assignment of interventions (for controlled trials)**  
9

10 Allocation:

11 Sequence generation 16a Method of generating the allocation sequence (eg, computer-generated random numbers), and list of any \_\_\_\_\_ 4,5 \_\_\_\_\_  
12 factors for stratification. To reduce predictability of a random sequence, details of any planned restriction  
13 (eg, blocking) should be provided in a separate document that is unavailable to those who enrol participants  
14 or assign interventions  
15

16  
17 Allocation concealment mechanism 16b Mechanism of implementing the allocation sequence (eg, central telephone; sequentially numbered, \_\_\_\_\_ 4,5 \_\_\_\_\_  
18 opaque, sealed envelopes), describing any steps to conceal the sequence until interventions are assigned  
19

20  
21 Implementation 16c Who will generate the allocation sequence, who will enrol participants, and who will assign participants to \_\_\_\_\_ 4 \_\_\_\_\_  
22 interventions  
23

24 Blinding (masking) 17a Who will be blinded after assignment to interventions (eg, trial participants, care providers, outcome \_\_\_\_\_ 9 \_\_\_\_\_  
25 assessors, data analysts), and how  
26

27 17b If blinded, circumstances under which unblinding is permissible, and procedure for revealing a participant's \_\_\_\_\_ n/a \_\_\_\_\_  
28 allocated intervention during the trial  
29

30  
31 **Methods: Data collection, management, and analysis**  
32

33 Data collection methods 18a Plans for assessment and collection of outcome, baseline, and other trial data, including any related \_\_\_\_\_ 9 \_\_\_\_\_  
34 processes to promote data quality (eg, duplicate measurements, training of assessors) and a description of  
35 study instruments (eg, questionnaires, laboratory tests) along with their reliability and validity, if known.  
36 Reference to where data collection forms can be found, if not in the protocol  
37

38 18b Plans to promote participant retention and complete follow-up, including list of any outcome data to be \_\_\_\_\_ 9 \_\_\_\_\_  
39 collected for participants who discontinue or deviate from intervention protocols  
40  
41  
42  
43  
44

|    |                                 |     |                                                                                                                                                                                                                                                                                                                                       |            |
|----|---------------------------------|-----|---------------------------------------------------------------------------------------------------------------------------------------------------------------------------------------------------------------------------------------------------------------------------------------------------------------------------------------|------------|
| 1  |                                 |     |                                                                                                                                                                                                                                                                                                                                       |            |
| 2  |                                 |     |                                                                                                                                                                                                                                                                                                                                       |            |
| 3  | Data management                 | 19  | Plans for data entry, coding, security, and storage, including any related processes to promote data quality (eg, double data entry; range checks for data values). Reference to where details of data management procedures can be found, if not in the protocol                                                                     | ___9___    |
| 4  |                                 |     |                                                                                                                                                                                                                                                                                                                                       |            |
| 5  |                                 |     |                                                                                                                                                                                                                                                                                                                                       |            |
| 6  |                                 |     |                                                                                                                                                                                                                                                                                                                                       |            |
| 7  | Statistical methods             | 20a | Statistical methods for analysing primary and secondary outcomes. Reference to where other details of the statistical analysis plan can be found, if not in the protocol                                                                                                                                                              | ___9,10___ |
| 8  |                                 |     |                                                                                                                                                                                                                                                                                                                                       |            |
| 9  |                                 |     |                                                                                                                                                                                                                                                                                                                                       |            |
| 10 |                                 | 20b | Methods for any additional analyses (eg, subgroup and adjusted analyses)                                                                                                                                                                                                                                                              | ___9,10___ |
| 11 |                                 |     |                                                                                                                                                                                                                                                                                                                                       |            |
| 12 |                                 | 20c | Definition of analysis population relating to protocol non-adherence (eg, as randomised analysis), and any statistical methods to handle missing data (eg, multiple imputation)                                                                                                                                                       | ___9,10___ |
| 13 |                                 |     |                                                                                                                                                                                                                                                                                                                                       |            |
| 14 |                                 |     |                                                                                                                                                                                                                                                                                                                                       |            |
| 15 | <b>Methods: Monitoring</b>      |     |                                                                                                                                                                                                                                                                                                                                       |            |
| 16 |                                 |     |                                                                                                                                                                                                                                                                                                                                       |            |
| 17 | Data monitoring                 | 21a | Composition of data monitoring committee (DMC); summary of its role and reporting structure; statement of whether it is independent from the sponsor and competing interests; and reference to where further details about its charter can be found, if not in the protocol. Alternatively, an explanation of why a DMC is not needed | ___10___   |
| 18 |                                 |     |                                                                                                                                                                                                                                                                                                                                       |            |
| 19 |                                 |     |                                                                                                                                                                                                                                                                                                                                       |            |
| 20 |                                 |     |                                                                                                                                                                                                                                                                                                                                       |            |
| 21 |                                 |     |                                                                                                                                                                                                                                                                                                                                       |            |
| 22 |                                 | 21b | Description of any interim analyses and stopping guidelines, including who will have access to these interim results and make the final decision to terminate the trial                                                                                                                                                               | ___10___   |
| 23 |                                 |     |                                                                                                                                                                                                                                                                                                                                       |            |
| 24 |                                 |     |                                                                                                                                                                                                                                                                                                                                       |            |
| 25 | Harms                           | 22  | Plans for collecting, assessing, reporting, and managing solicited and spontaneously reported adverse events and other unintended effects of trial interventions or trial conduct                                                                                                                                                     | ___10___   |
| 26 |                                 |     |                                                                                                                                                                                                                                                                                                                                       |            |
| 27 |                                 |     |                                                                                                                                                                                                                                                                                                                                       |            |
| 28 | Auditing                        | 23  | Frequency and procedures for auditing trial conduct, if any, and whether the process will be independent from investigators and the sponsor                                                                                                                                                                                           | ___n/a___  |
| 29 |                                 |     |                                                                                                                                                                                                                                                                                                                                       |            |
| 30 |                                 |     |                                                                                                                                                                                                                                                                                                                                       |            |
| 31 |                                 |     |                                                                                                                                                                                                                                                                                                                                       |            |
| 32 | <b>Ethics and dissemination</b> |     |                                                                                                                                                                                                                                                                                                                                       |            |
| 33 |                                 |     |                                                                                                                                                                                                                                                                                                                                       |            |
| 34 | Research ethics approval        | 24  | Plans for seeking research ethics committee/institutional review board (REC/IRB) approval                                                                                                                                                                                                                                             | ___1___    |
| 35 |                                 |     |                                                                                                                                                                                                                                                                                                                                       |            |
| 36 |                                 |     |                                                                                                                                                                                                                                                                                                                                       |            |
| 37 | Protocol amendments             | 25  | Plans for communicating important protocol modifications (eg, changes to eligibility criteria, outcomes, analyses) to relevant parties (eg, investigators, REC/IRBs, trial participants, trial registries, journals, regulators)                                                                                                      | ___10___   |
| 38 |                                 |     |                                                                                                                                                                                                                                                                                                                                       |            |
| 39 |                                 |     |                                                                                                                                                                                                                                                                                                                                       |            |
| 40 |                                 |     |                                                                                                                                                                                                                                                                                                                                       |            |
| 41 |                                 |     |                                                                                                                                                                                                                                                                                                                                       |            |
| 42 |                                 |     |                                                                                                                                                                                                                                                                                                                                       |            |
| 43 |                                 |     |                                                                                                                                                                                                                                                                                                                                       |            |
| 44 |                                 |     |                                                                                                                                                                                                                                                                                                                                       |            |
| 45 |                                 |     |                                                                                                                                                                                                                                                                                                                                       |            |
| 46 |                                 |     |                                                                                                                                                                                                                                                                                                                                       |            |
| 47 |                                 |     |                                                                                                                                                                                                                                                                                                                                       |            |

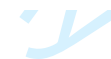

|    |                               |     |                                                                                                                                                                                                                                                                                     |     |
|----|-------------------------------|-----|-------------------------------------------------------------------------------------------------------------------------------------------------------------------------------------------------------------------------------------------------------------------------------------|-----|
| 1  |                               |     |                                                                                                                                                                                                                                                                                     |     |
| 2  |                               |     |                                                                                                                                                                                                                                                                                     |     |
| 3  | Consent or assent             | 26a | Who will obtain informed consent or assent from potential trial participants or authorised surrogates, and how (see Item 32)                                                                                                                                                        | 3-4 |
| 4  |                               |     |                                                                                                                                                                                                                                                                                     |     |
| 5  |                               |     |                                                                                                                                                                                                                                                                                     |     |
| 6  |                               | 26b | Additional consent provisions for collection and use of participant data and biological specimens in ancillary studies, if applicable                                                                                                                                               | n/a |
| 7  |                               |     |                                                                                                                                                                                                                                                                                     |     |
| 8  | Confidentiality               | 27  | How personal information about potential and enrolled participants will be collected, shared, and maintained in order to protect confidentiality before, during, and after the trial                                                                                                | 9   |
| 9  |                               |     |                                                                                                                                                                                                                                                                                     |     |
| 10 |                               |     |                                                                                                                                                                                                                                                                                     |     |
| 11 | Declaration of interests      | 28  | Financial and other competing interests for principal investigators for the overall trial and each study site                                                                                                                                                                       | 12  |
| 12 |                               |     |                                                                                                                                                                                                                                                                                     |     |
| 13 |                               |     |                                                                                                                                                                                                                                                                                     |     |
| 14 | Access to data                | 29  | Statement of who will have access to the final trial dataset, and disclosure of contractual agreements that limit such access for investigators                                                                                                                                     | 9   |
| 15 |                               |     |                                                                                                                                                                                                                                                                                     |     |
| 16 |                               |     |                                                                                                                                                                                                                                                                                     |     |
| 17 | Ancillary and post-trial care | 30  | Provisions, if any, for ancillary and post-trial care, and for compensation to those who suffer harm from trial participation                                                                                                                                                       | n/a |
| 18 |                               |     |                                                                                                                                                                                                                                                                                     |     |
| 19 |                               |     |                                                                                                                                                                                                                                                                                     |     |
| 20 | Dissemination policy          | 31a | Plans for investigators and sponsor to communicate trial results to participants, healthcare professionals, the public, and other relevant groups (eg, via publication, reporting in results databases, or other data sharing arrangements), including any publication restrictions | 1   |
| 21 |                               |     |                                                                                                                                                                                                                                                                                     |     |
| 22 |                               |     |                                                                                                                                                                                                                                                                                     |     |
| 23 |                               |     |                                                                                                                                                                                                                                                                                     |     |
| 24 |                               |     |                                                                                                                                                                                                                                                                                     |     |
| 25 |                               | 31b | Authorship eligibility guidelines and any intended use of professional writers                                                                                                                                                                                                      | n/a |
| 26 |                               |     |                                                                                                                                                                                                                                                                                     |     |
| 27 |                               | 31c | Plans, if any, for granting public access to the full protocol, participant-level dataset, and statistical code                                                                                                                                                                     | n/a |
| 28 |                               |     |                                                                                                                                                                                                                                                                                     |     |
| 29 | <b>Appendices</b>             |     |                                                                                                                                                                                                                                                                                     |     |
| 30 |                               |     |                                                                                                                                                                                                                                                                                     |     |
| 31 | Informed consent materials    | 32  | Model consent form and other related documentation given to participants and authorised surrogates                                                                                                                                                                                  | 4   |
| 32 |                               |     |                                                                                                                                                                                                                                                                                     |     |
| 33 |                               |     |                                                                                                                                                                                                                                                                                     |     |
| 34 | Biological specimens          | 33  | Plans for collection, laboratory evaluation, and storage of biological specimens for genetic or molecular analysis in the current trial and for future use in ancillary studies, if applicable                                                                                      | n/a |
| 35 |                               |     |                                                                                                                                                                                                                                                                                     |     |
| 36 |                               |     |                                                                                                                                                                                                                                                                                     |     |

37 \*It is strongly recommended that this checklist be read in conjunction with the SPIRIT 2013 Explanation & Elaboration for important clarification on the items.  
 38 Amendments to the protocol should be tracked and dated. The SPIRIT checklist is copyrighted by the SPIRIT Group under the Creative Commons  
 39 "[Attribution-NonCommercial-NoDerivs 3.0 Unported](https://creativecommons.org/licenses/by-nc-nd/3.0/)" license.  
 40
